# Supplementary material for: Leptin alters energy intake and fat mass but not energy expenditure in lean subjects
Source: PubMed Central journal article supplement (PMC7553922; doi:10.1038/s41467-020-18885-9), 2020-10-13
Supplement: 41467_2020_18885_MOESM1_ESM.pdf [file 41467_2020_18885_MOESM1_ESM.pdf]

**Supplementary Table 1:** Correlations of FFA with hormones in Study 3 (open-label long-term leptin treatment) and 4 (placebo-controlled long-term leptin treatment)

| Hormones                   | Study 3 (n=7) |       | Study 4 (Leptin Group [n=10]) |       |
|----------------------------|---------------|-------|-------------------------------|-------|
|                            | FFA (meq/l)   |       | FFA (meq/l)                   |       |
|                            | R             | P     | R                             | P     |
| <b>TSH (μIU/ml)</b>        | 0.348         | 0.221 | 0.123                         | 0.300 |
| <b>FT3 (pg/ml)</b>         | -0.391        | 0.166 | 0.106                         | 0.371 |
| <b>FT4 (ng/dl)</b>         | -0.428        | 0.125 | -0.078                        | 0.509 |
| <b>ACTH (pg/ml)</b>        | -0.298        | 0.402 | ND                            | ND    |
| <b>Cortisol (μg/dl)</b>    | ND            | ND    | 0.092                         | 0.437 |
| <b>Aldosterone (pg/ml)</b> | -0.536        | 0.047 | -0.027                        | 0.825 |
| <b>Renin (pg/ml)</b>       | -0.164        | 0.575 | -0.026                        | 0.832 |
| <b>GHBP (pmol/l)</b>       | 0.071         | 0.807 | ND                            | ND    |
| <b>IGF-1 (ng/ml)</b>       | 0.438         | 0.116 | -0.160                        | 0.185 |

Repeated measures correlations were performed with “rmcorr” package in R studio. P-values reported are two-sided.

R: correlation coefficient; P: p-value; TSH: thyroid-stimulating hormone; FT3: free triiodothyronine; FT4: free thyroxine; ACTH: adrenocorticotrophic hormone; GHBP: growth hormone-binding protein; IGF-1: insulin-like growth factor 1; ND: Data not available

**Supplementary Table 2:** Documentation of published, unpublished and existing raw data analyzed differently to answer new questions, presented in all figures.

|                 |          | Published                                                                                                                                                                                                                                                                                                                                                                                                                | Existing raw data from prior studies are analyzed differently herein to answer a new question                                                                                                                                                                                                                                                                                                                                                                                                                                                                                                                                                                                                                                                                                                            | Unpublished |
|-----------------|----------|--------------------------------------------------------------------------------------------------------------------------------------------------------------------------------------------------------------------------------------------------------------------------------------------------------------------------------------------------------------------------------------------------------------------------|----------------------------------------------------------------------------------------------------------------------------------------------------------------------------------------------------------------------------------------------------------------------------------------------------------------------------------------------------------------------------------------------------------------------------------------------------------------------------------------------------------------------------------------------------------------------------------------------------------------------------------------------------------------------------------------------------------------------------------------------------------------------------------------------------------|-------------|
| <b>Figure 2</b> | <b>a</b> |                                                                                                                                                                                                                                                                                                                                                                                                                          | In study 1, leptin and weight have been published for males <sup>1</sup> and females <sup>2</sup> separately and as a combined analysis <sup>3-5</sup> to show no effect of short-term leptin treatment on weight loss during 72-hour fasting, but here we analyzed all the original data de novo in order to answer a novel question i.e. whether baseline leptin levels (prior to treatment initiation) correlate with % of weight change after 72-hour fasting treated with placebo or leptin at replacement doses.                                                                                                                                                                                                                                                                                   |             |
|                 | <b>b</b> |                                                                                                                                                                                                                                                                                                                                                                                                                          | In study 2, leptin and weight have been published to demonstrate changes in these variables during 72-hour fasting separately for each group*dose combination (i.e.dose A in lean men, dose B in lean men, C in lean men, A in lean women, B in lean women etc.) <sup>6</sup> , but here we analyzed the original raw data de novo in order to answer following novel questions: a) Do baseline leptin levels (prior to treatment initiation) correlate with % of weight change observed after 72-hour of fasting treated with three escalating leptin doses, when lean men, lean women and obese men were studied both separately as well as together? b) Are the % weight changes observed under the three escalating leptin doses significantly different between lean men, lean women and obese men? |             |
|                 | <b>c</b> | Mean leptin, weight and fat mass have been published for studies 3 and 4 <sup>7,8</sup> but data are analyzed again and are presented here as change from baseline ( $\Delta$ ) in order to answer following questions: Are the absolute (delta) changes in leptin levels associated with the changes observed in body weight and fat mass during leptin treatment? Do these changes reverse after treatment completion? | Mean leptin and weight have been published for studies 3 and 4 <sup>7,8</sup> (women with HA) to show weight-reducing effects of long-term leptin replacement, but here we analyzed the original raw data in order to answer following novel question: Do baseline leptin levels (prior to treatment initiation) correlate with % of weight change observed after 8 weeks of treatment with leptin? For this question we have combined the raw data from study 3 and study 4 in our analysis.                                                                                                                                                                                                                                                                                                            |             |

|                 |          |                             |                                                                                                                                                                                                                                                                                                                                                                            |                                                                                                            |
|-----------------|----------|-----------------------------|----------------------------------------------------------------------------------------------------------------------------------------------------------------------------------------------------------------------------------------------------------------------------------------------------------------------------------------------------------------------------|------------------------------------------------------------------------------------------------------------|
| <b>Figure 3</b> | <b>a</b> |                             | In study 1, food intake has been published for males <sup>1</sup> , but neither for females nor as combined analysis. Here we present for the first time food intake as a combined analysis of males and females, and explore whether leptin levels prior to meal correlate with caloric intake after 72-hour fasting treated with placebo or leptin at replacement doses. |                                                                                                            |
|                 | <b>b</b> |                             |                                                                                                                                                                                                                                                                                                                                                                            | Expected fat mass loss in studies 3 and 4 based on leptin-induced caloric deficit demonstrated in study 1. |
|                 | <b>c</b> |                             | In study 1, RMR has been published separately for males <sup>1</sup> and females <sup>2,9</sup> , but not as a combined analysis. Here we present for the first time RMR as a combined analysis of data from males and females to increase sample size and power.                                                                                                          |                                                                                                            |
|                 | <b>d</b> |                             |                                                                                                                                                                                                                                                                                                                                                                            | Temperature and respiratory rate in study 2                                                                |
|                 | <b>e</b> | RMR in study 3 <sup>8</sup> |                                                                                                                                                                                                                                                                                                                                                                            | Temperature, exercise in study 3                                                                           |
|                 | <b>f</b> |                             |                                                                                                                                                                                                                                                                                                                                                                            | RMR, temperature, exercise in study 4                                                                      |
| <b>Figure 4</b> | <b>a</b> |                             | In study 1, HR and BP have been published for females <sup>9</sup> , but neither for males nor as a combined analysis. Here we present for the first time HR and BP as a combined analysis of data from males and females to increase sample size and power.                                                                                                               |                                                                                                            |
|                 | <b>b</b> |                             |                                                                                                                                                                                                                                                                                                                                                                            | HR, SBP, DBP and MBP in study 2                                                                            |
|                 | <b>c</b> |                             |                                                                                                                                                                                                                                                                                                                                                                            | HR, SBP, DBP and MPB in study 3                                                                            |
|                 | <b>d</b> |                             |                                                                                                                                                                                                                                                                                                                                                                            | HR, SBP, DBP and MBP in study 4                                                                            |
| <b>Figure 5</b> | <b>a</b> |                             | In study 1, aldosterone, cortisol and urine catecholamines have been published separately for males <sup>1</sup> and females <sup>2,9</sup> , but not as a combined analysis. Here we present for the first time these variables as a combined analysis of males and females to increase sample size and power.                                                            |                                                                                                            |
|                 | <b>b</b> |                             |                                                                                                                                                                                                                                                                                                                                                                            | Aldosterone, renin and urine catecholamines in study 2                                                     |

|                               |            |                                                                       |                                                                                                                                                                                                                                                                                                                                                                                                                                                                                                          |                                                                       |
|-------------------------------|------------|-----------------------------------------------------------------------|----------------------------------------------------------------------------------------------------------------------------------------------------------------------------------------------------------------------------------------------------------------------------------------------------------------------------------------------------------------------------------------------------------------------------------------------------------------------------------------------------------|-----------------------------------------------------------------------|
|                               | <b>c</b>   |                                                                       |                                                                                                                                                                                                                                                                                                                                                                                                                                                                                                          | Aldosterone and renin in study 3                                      |
|                               | <b>d</b>   |                                                                       |                                                                                                                                                                                                                                                                                                                                                                                                                                                                                                          | Aldosterone, renin, free cortisol and urine catecholamines in study 4 |
| <b>Figure 6</b>               | <b>a-d</b> |                                                                       |                                                                                                                                                                                                                                                                                                                                                                                                                                                                                                          | Metabolite profile in study 1                                         |
|                               | <b>e</b>   |                                                                       |                                                                                                                                                                                                                                                                                                                                                                                                                                                                                                          | Metabolite profile in study 4                                         |
| <b>Figure 7</b>               | <b>a</b>   |                                                                       |                                                                                                                                                                                                                                                                                                                                                                                                                                                                                                          | Fatty acids in study 1                                                |
|                               | <b>b</b>   |                                                                       | In study 1, FFA have been published separately for males <sup>1</sup> and females <sup>2</sup> , but not as a combined analysis. Here we present for the first time FFA as a combined analysis of data from males and females to increase sample size and power.                                                                                                                                                                                                                                         |                                                                       |
|                               | <b>c</b>   |                                                                       |                                                                                                                                                                                                                                                                                                                                                                                                                                                                                                          | FFA in study 3                                                        |
|                               | <b>d</b>   |                                                                       |                                                                                                                                                                                                                                                                                                                                                                                                                                                                                                          | FFA in study 4                                                        |
| <b>Supplementary Figure 1</b> | <b>a</b>   |                                                                       | Mean leptin and weight have been published for study 2, but a potential correlation between these variables has not been investigated previously <sup>6</sup> . Here we present for the first time an analysis to explore whether leptin levels at baseline (before treatment initiation) correlate with % weight change after 72-hour fasting treated with escalating doses of leptin separately in each group (i.e. lean men, obese men, lean women) after adjusting for intra-individual variability. |                                                                       |
|                               | <b>b</b>   |                                                                       | Mean weight has been published for study 2, to demonstrate change with fasting separately for each group (i.e. lean men, obese men, lean women)*dose (i.e. 0.01, 0.1, 0.3mg/kg) combination, but not as a within group analysis for time and dose effect <sup>6</sup> . Here we present for the first time a within group analysis to explore potential leptin-dose dependent effects on %weight change after 72-hour fasting separately in lean men, obese men and lean women.                          |                                                                       |
|                               | <b>c</b>   | Lean mass in study 3 presented as % change from baseline <sup>8</sup> |                                                                                                                                                                                                                                                                                                                                                                                                                                                                                                          |                                                                       |

|                               |          |                                                                        |                                                                                                                                                                                                                                                                                                                                                                                                                                                                                                  |                                                                                                                                                                                                                                                                                                             |
|-------------------------------|----------|------------------------------------------------------------------------|--------------------------------------------------------------------------------------------------------------------------------------------------------------------------------------------------------------------------------------------------------------------------------------------------------------------------------------------------------------------------------------------------------------------------------------------------------------------------------------------------|-------------------------------------------------------------------------------------------------------------------------------------------------------------------------------------------------------------------------------------------------------------------------------------------------------------|
|                               | <b>d</b> | Lean mass in study 4 presented as % change from baseline <sup>10</sup> |                                                                                                                                                                                                                                                                                                                                                                                                                                                                                                  |                                                                                                                                                                                                                                                                                                             |
|                               | <b>e</b> |                                                                        | In study 1, food intake has been published for males <sup>1</sup> , but neither for females nor as combined analysis. Here we applied a combined analysis of males and females to explore whether leptin levels prior to meal correlate with caloric intake after 72-hour fasting treated with placebo or leptin at replacement doses, after adjusting for intra-individual variability.                                                                                                         |                                                                                                                                                                                                                                                                                                             |
| <b>Supplementary Figure 2</b> | <b>a</b> |                                                                        | In study 2, leptin and weight have been published for the three fasting admissions separately for each dose (i.e. 0.01, 0.1, 0.3 mg/kg)*group (i.e. lean men, obese men, lean women) combination, but not as a within dose analysis for time and group effect <sup>6</sup> . Here we present for the first time a within dose A (i.e. 0.01mg/kg/day) analysis to explore physiological leptin levels' effects on weight change during 72-hour fasting in lean men vs obese men vs lean women.    | Respiratory rate, temperature, FFA, aldosterone, renin, urine catecholamines, HR, SBP and DBP in study 2. A within dose A (i.e. 0.01mg/kg/day) analysis was performed to explore physiological leptin levels' effects on these variables during 72-hour fasting in lean men vs obese men vs lean women.     |
|                               | <b>b</b> |                                                                        | In study 2, leptin and weight have been published for the three fasting admissions separately for each dose(i.e. 0.01, 0.1, 0.3 mg/kg)*group (i.e. lean men, obese men, lean women) combination, but not as a within dose analysis for time and group effect <sup>6</sup> . Here we present for the first time a within dose B (i.e. 0.1mg/kg/day) analysis to explore supraphysiological leptin levels' effects on weight change during 72-hour fasting in lean men vs obese men vs lean women. | Respiratory rate, temperature, FFA, aldosterone, renin, urine catecholamines, HR, SBP and DBP in study 2. A within dose B (i.e. 0.1mg/kg/day) analysis was performed to explore supraphysiological leptin levels' effects on these variables during 72-hour fasting in lean men vs obese men vs lean women. |
|                               | <b>c</b> |                                                                        | In study 2, leptin and weight have been published for the three fasting admissions separately for each dose(i.e. 0.01, 0.1, 0.3 mg/kg)*group (i.e. lean men, obese men, lean women) combination, but not as a within dose analysis for time and group effect <sup>6</sup> . Here we present for the first time a within dose C (i.e. 0.3mg/kg/day) analysis to explore pharmacological leptin levels' effects on weight change during 72-hour fasting in lean men vs obese men vs lean women.    | Respiratory rate, temperature, FFA, aldosterone, renin, urine catecholamines, HR, SBP and DBP in study 2. A within dose C (i.e. 0.3mg/kg/day) analysis was performed to explore pharmacological leptin levels' effects on weight change during 72-hour fasting in lean men vs obese men vs lean women.      |

|                        |   |                                                                                                                                                                                                                                                                                                                                                                                                                                                                             |                                                                                                                                                                                                                                                             |
|------------------------|---|-----------------------------------------------------------------------------------------------------------------------------------------------------------------------------------------------------------------------------------------------------------------------------------------------------------------------------------------------------------------------------------------------------------------------------------------------------------------------------|-------------------------------------------------------------------------------------------------------------------------------------------------------------------------------------------------------------------------------------------------------------|
| Supplementary Figure 3 | a | In study 2, leptin has been published for the three fed admissions separately for each dose (i.e. 0.01, 0.1, 0.3 mg/kg)*group (i.e. lean men, obese men, lean women) combination, but not as a within dose analysis for time and group effect <sup>6</sup> . Here we present for the first time a within dose A (i.e. 0.01mg/kg/day) analysis to explore physiological leptin levels' effects on weight change during fed state in lean men vs obese men vs lean women.     | Respiratory rate, temperature, FFA, HR, SBP and DBP in study 2. A within dose A (i.e. 0.01mg/kg/day) analysis was performed to explore physiological leptin levels' effects on these variables during fed state in lean men vs obese men vs lean women.     |
|                        | b | In study 2, leptin has been published for the three fed admissions separately for each dose (i.e. 0.01, 0.1, 0.3 mg/kg)*group (i.e. lean men, obese men, lean women) combination, but not as a within dose analysis for time and group effect <sup>6</sup> . Here we present for the first time a within dose B (i.e. 0.1mg/kg/day) analysis to explore supraphysiological leptin levels' effects on weight change during fed state in lean men vs obese men vs lean women. | Respiratory rate, temperature, FFA, HR, SBP and DBP in study 2. A within dose B (i.e. 0.1mg/kg/day) analysis was performed to explore supraphysiological leptin levels' effects on these variables during fed state in lean men vs obese men vs lean women. |
|                        | c | In study 2, leptin has been published for the three fed admissions separately for each dose (i.e. 0.01, 0.1, 0.3 mg/kg)*group (i.e. lean men, obese men, lean women) combination, but not as a within dose analysis for time and group effect <sup>6</sup> . Here we present for the first time a within dose C (i.e. 0.3mg/kg/day) analysis to explore pharmacological leptin levels' effects on weight change during fed state in lean men vs obese men vs lean women.    | Respiratory rate, temperature, FFA, HR, SBP and DBP in study 2. A within dose C (i.e. 0.3mg/kg/day) analysis was performed to explore pharmacological leptin levels' effects on these variables during fed state in lean men vs obese men vs lean women.    |
| Supplementary Figure 4 | a | In study 1, RQ has been published separately for males <sup>1</sup> and females <sup>2</sup> and macronutrient utilization has been published only for males <sup>1</sup> , but not as a combined analysis. Here we present for the first time RQ and macronutrient utilization as a combined analysis of males and females to increase sample size and power.                                                                                                              |                                                                                                                                                                                                                                                             |
|                        | b |                                                                                                                                                                                                                                                                                                                                                                                                                                                                             | RQ and macronutrient utilization in study 3                                                                                                                                                                                                                 |
|                        | c |                                                                                                                                                                                                                                                                                                                                                                                                                                                                             | Macronutrient utilization in study 4                                                                                                                                                                                                                        |
| Supplementary Figure 5 | a |                                                                                                                                                                                                                                                                                                                                                                                                                                                                             | Ketone bodies in study 1                                                                                                                                                                                                                                    |
|                        | b |                                                                                                                                                                                                                                                                                                                                                                                                                                                                             | Amino acids in study 1                                                                                                                                                                                                                                      |
|                        | c |                                                                                                                                                                                                                                                                                                                                                                                                                                                                             | Lipoproteins in study 1                                                                                                                                                                                                                                     |

|                        |   |  |  |                                          |
|------------------------|---|--|--|------------------------------------------|
| Supplementary Figure 6 | a |  |  | Metabolite profile in study 2            |
|                        | b |  |  | Lipoproteins in study 2                  |
|                        | c |  |  | Ketone bodies and amino acids in study 2 |
|                        | d |  |  | Fatty acids in study 2                   |

FFA, free fatty acids; RMR, resting metabolic rate; HR: heart rate; SBP, systolic blood pressure; DBP, diastolic blood pressure; MBP, mean blood pressure; RQ, respiratory quotient.

**Supplemental Table 3:** Metabolic equivalents (MetS) used to calculate physical activity in Study 3 (open-label long-term leptin treatment) and 4 (placebo-controlled long-term leptin treatment)

| Type of exercise as specified by subject                                                                           | MetS        | Category              |
|--------------------------------------------------------------------------------------------------------------------|-------------|-----------------------|
| <b>Elliptical</b>                                                                                                  | <b>5</b>    | conditioning exercise |
| <b>Power Yoga</b>                                                                                                  | <b>4</b>    | conditioning exercise |
| <b>Kick Boxing</b>                                                                                                 | <b>10.3</b> | sports                |
| <b>Walking*</b>                                                                                                    | <b>4.15</b> |                       |
| <i>walking, less than 2.0 mph, level, strolling, very slow</i>                                                     | 2           | walking               |
| <i>walking, 2.0 mph, level, slow pace, firm surface</i>                                                            | 2.8         | walking               |
| <i>walking for pleasure (Taylor Code 010)</i>                                                                      | 3.5         | walking               |
| <i>walking from house to car or bus, from car or bus to go to places, from car or bus to and from the worksite</i> | 2.5         | walking               |
| <i>walking to neighbor's house or family's house for social reasons</i>                                            | 2.5         | walking               |
| <i>walking the dog</i>                                                                                             | 3           | walking               |
| <i>walking, 2.5 mph, level, firm surface</i>                                                                       | 3           | walking               |
| <i>walking, 2.5 mph, downhill</i>                                                                                  | 3.3         | walking               |
| <i>walking, 2.8 to 3.2 mph, level, moderate pace, firm surface</i>                                                 | 3.5         | walking               |
| <i>walking, 3.5 mph, level, brisk, firm surface, walking for exercise</i>                                          | 4.3         | walking               |
| <i>walking, 2.9 to 3.5 mph, uphill, 1 to 5% grade</i>                                                              | 5.3         | walking               |
| <i>walking, 2.9 to 3.5 mph, uphill, 6% to 15% grade</i>                                                            | 8           | walking               |
| <i>walking, 4.0 mph, level, firm surface, very brisk pace</i>                                                      | 5           | walking               |
| <i>walking, 4.5 mph, level, firm surface, very, very brisk</i>                                                     | 7           | walking               |
| <i>walking, 5.0 mph, level, firm surface</i>                                                                       | 8.3         | walking               |
| <i>walking, 5.0 mph, uphill, 3% grade</i>                                                                          | 9.8         | walking               |
| <i>walking, for pleasure, work break</i>                                                                           | 3.5         | walking               |
| <i>walking, grass track</i>                                                                                        | 4.8         | walking               |
| <i>walking, normal pace, plowed field or sand</i>                                                                  | 4.5         | walking               |
| <i>walking, to work or class (Taylor Code 015)</i>                                                                 | 4           | walking               |
| <i>walking, to and from an outhouse</i>                                                                            | 2.5         | walking               |
| <i>walking, for exercise, 3.5 to 4 mph, with ski poles, Nordic walking, level, moderate pace</i>                   | 4.8         | walking               |
| <i>walking, for exercise, 5.0 mph, with ski poles, Nordic walking, level, fast pace</i>                            | 9.5         | walking               |
| <i>walking, for exercise, with ski poles, Nordic walking, uphill</i>                                               | 6.8         | walking               |
| <b>Jogging*</b>                                                                                                    | <b>6.5</b>  |                       |
| <i>jog/walk combination (jogging component of less than 10 minutes) (Taylor Code 180)</i>                          | 6           | running               |



|                                                                |              |                       |
|----------------------------------------------------------------|--------------|-----------------------|
| <i>jogging, general</i>                                        | 7            | running               |
| <i>jogging, in place</i>                                       | 8            | running               |
| <i>jogging, on a mini-tramp</i>                                | 4.5          | running               |
| <b>Yoga*</b>                                                   | <b>2.5</b>   |                       |
| <i>yoga, Hatha</i>                                             | 2.5          | conditioning exercise |
| <i>yoga, Nadisodhana</i>                                       | 2            | conditioning exercise |
| <i>yoga, Surya Namaskar</i>                                    | 3.3          | conditioning exercise |
| <b>Slide*</b>                                                  | <b>11</b>    | conditioning exercise |
| <b>Running*</b>                                                | <b>11.25</b> |                       |
| <i>running, 4 mph (13 min/mile)</i>                            | 6            | running               |
| <i>running, 5 mph (12 min/mile)</i>                            | 8.3          | running               |
| <i>running, 5.2 mph (11.5 min/mile)</i>                        | 9            | running               |
| <i>running, 6 mph (10 min/mile)</i>                            | 9.8          | running               |
| <i>running, 6.7 mph (9 min/mile)</i>                           | 10.5         | running               |
| <i>running, 7 mph (8.5 min/mile)</i>                           | 11           | running               |
| <i>running, 7.5 mph (8 min/mile)</i>                           | 11.5         | running               |
| <i>running, 8 mph (7.5 min/mile)</i>                           | 11.8         | running               |
| <i>running, 8.6 mph (7 min/mile)</i>                           | 12.3         | running               |
| <i>running, 9 mph (6.5 min/mile)</i>                           | 12.8         | running               |
| <i>running, 10 mph (6 min/mile)</i>                            | 14.5         | running               |
| <i>running, 11 mph (5.5 min/mile)</i>                          | 16           | running               |
| <i>running, 12 mph (5 min/mile)</i>                            | 19.0         | running               |
| <i>running, 13 mph (4.6 min/mile)</i>                          | 19.8         | running               |
| <i>running, 14 mph (4.3 min/mile)</i>                          | 23           | running               |
| <i>running, cross country</i>                                  | 9            | running               |
| <i>running, (Taylor code 200)</i>                              | 8            | running               |
| <i>running, stairs, up</i>                                     | 15           | running               |
| <i>running, on a track, team practice</i>                      | 10           | running               |
| <i>running, training, pushing a wheelchair or baby carrier</i> | 8            | running               |
| <i>running, marathon</i>                                       | 13.3         | running               |
| <b>Hip-hop dance*</b>                                          | <b>7.8</b>   | dancing               |
| <b>Step aerobic*</b>                                           | <b>7.5</b>   |                       |
| <i>aerobic, step, with 6 - 8inch step</i>                      | 7.5          | dancing               |
| <i>aerobic, step, with 10 - 12inch step</i>                    | 9.5          | dancing               |

|                                                                         |             |                       |
|-------------------------------------------------------------------------|-------------|-----------------------|
| <i>aerobic, step, with 4-inch step</i>                                  | 5.5         | dancing               |
| <b>Circuit boxing*</b>                                                  | <b>7.8</b>  |                       |
| <i>boxing, in ring, general</i>                                         | 12.8        | sports                |
| <i>boxing, punching bag</i>                                             | 5.5         | sports                |
| <i>boxing, sparring</i>                                                 | 7.8         | sports                |
| <b>Pilates*</b>                                                         | <b>3</b>    | conditioning exercise |
| <b>squash*</b>                                                          | <b>9.65</b> |                       |
| <i>squash (Taylor Code 530)</i>                                         | 12          | sports                |
| <i>squash, general</i>                                                  | 7.3         | sports                |
| <b>Reebok Coreboard/ Off-ice skating*</b>                               | <b>3.9</b>  |                       |
| <i>calisthenics (e.g., situps, abdominal crunches), light effort</i>    | 2.8         | conditioning exercise |
| <i>resistance (weight) training, squats, slow or explosive effort</i>   | 5           | conditioning exercise |
| <b>Abs</b>                                                              | <b>2.8</b>  | conditioning exercise |
| <b>x-trainer*</b>                                                       | <b>6.8</b>  |                       |
| <i>Elliptical trainer, moderate effort</i>                              | 5           | conditioning exercise |
| <i>bicycling, stationary, general</i>                                   | 7           | conditioning exercise |
| <i>bicycling, stationary, 30-50 watts, very light to light effort</i>   | 3.5         | conditioning exercise |
| <i>bicycling, stationary, 90-100 watts, moderate to vigorous effort</i> | 6.8         | conditioning exercise |
| <i>bicycling, stationary, 101-160 watts, vigorous effort</i>            | 8.8         | conditioning exercise |
| <i>bicycling, stationary, 161-200 watts, vigorous effort</i>            | 11          | conditioning exercise |
| <i>bicycling, stationary, 51-89 watts, light-to-moderate effort</i>     | 4.8         | conditioning exercise |
| <b>Cardio*</b>                                                          | <b>9</b>    |                       |
| <i>stair-treadmill ergometer, general</i>                               | 9           | conditioning exercise |
| <i>rope skipping, general</i>                                           | 12.3        | conditioning exercise |
| <i>bicycling, stationary, general</i>                                   | 7           | conditioning exercise |
| <i>bicycling, stationary, 30-50 watts, very light to light effort</i>   | 3.5         | conditioning exercise |
| <i>bicycling, stationary, 90-100 watts, moderate to vigorous effort</i> | 6.8         | conditioning exercise |
| <i>bicycling, stationary, 101-160 watts, vigorous effort</i>            | 8.8         | conditioning exercise |
| <i>bicycling, stationary, 161-200 watts, vigorous effort</i>            | 11          | conditioning exercise |
| <i>bicycling, stationary, 201-270 watts, very vigorous effort</i>       | 14          | conditioning exercise |
| <i>bicycling, stationary, 51-89 watts, light-to-moderate effort</i>     | 4.8         | conditioning exercise |
| <i>bicycling, stationary, RPM/Spin bike class</i>                       | 8.5         | conditioning exercise |
| <i>aerobic, general</i>                                                 | 7.3         | dancing               |

|                                                                                           |            |                       |
|-------------------------------------------------------------------------------------------|------------|-----------------------|
| <i>aerobic, step, with 6 - 8 inch step</i>                                                | 7.5        | dancing               |
| <i>aerobic, step, with 10 - 12 inch step</i>                                              | 9.5        | dancing               |
| <i>aerobic, step, with 4-inch step</i>                                                    | 5.5        | dancing               |
| <i>bench step class, general</i>                                                          | 8.5        | dancing               |
| <i>aerobic, low impact</i>                                                                | 5          | dancing               |
| <i>aerobic, high impact</i>                                                               | 7.3        | dancing               |
| <i>jog/walk combination (jogging component of less than 10 minutes) (Taylor Code 180)</i> | 6          | running               |
| <i>jogging, general</i>                                                                   | 7          | running               |
| <i>jogging, in place</i>                                                                  | 8          | running               |
| <i>jogging, on a mini-tramp</i>                                                           | 4.5        | running               |
| <i>Running, 4 mph (13 min/mile)</i>                                                       | 6          | running               |
| <i>running, 5 mph (12 min/mile)</i>                                                       | 8.3        | running               |
| <i>running, 5.2 mph (11.5 min/mile)</i>                                                   | 9          | running               |
| <i>running, 6 mph (10 min/mile)</i>                                                       | 9.8        | running               |
| <i>running, 6.7 mph (9 min/mile)</i>                                                      | 10.5       | running               |
| <i>running, 7 mph (8.5 min/mile)</i>                                                      | 11         | running               |
| <i>running, 7.5 mph (8 min/mile)</i>                                                      | 11.5       | running               |
| <i>running, 8 mph (7.5 min/mile)</i>                                                      | 11.8       | running               |
| <i>running, 8.6 mph (7 min/mile)</i>                                                      | 12.3       | running               |
| <i>running, 9 mph (6.5 min/mile)</i>                                                      | 12.8       | running               |
| <i>running, 10 mph (6 min/mile)</i>                                                       | 14.5       | running               |
| <i>running, 11 mph (5.5 min/mile)</i>                                                     | 16         | running               |
| <i>running, 12 mph (5 min/mile)</i>                                                       | 19         | running               |
| <i>running, 13 mph (4.6 min/mile)</i>                                                     | 19.8       | running               |
| <i>running, 14 mph (4.3 min/mile)</i>                                                     | 23         | running               |
| <i>running, cross country</i>                                                             | 9          | running               |
| <i>running, (Taylor code 200)</i>                                                         | 8          | running               |
| <i>running, stairs, up</i>                                                                | 15         | running               |
| <b>Stretch</b>                                                                            | <b>2.3</b> | conditioning exercise |
| <b>Figure Skating</b>                                                                     | <b>14</b>  | winter activities     |
| <b>Tone*</b>                                                                              | <b>3.3</b> |                       |
| <i>calisthenics (e.g., push-ups, sit ups, pull-ups, lunges), moderate effort</i>          | 3.8        | conditioning exercise |
| <i>calisthenics (e.g., sit-ups, abdominal crunches), light effort</i>                     | 2.8        | conditioning exercise |
| <b>Ballet*</b>                                                                            | <b>5.9</b> |                       |

|                                                                              |             |                   |
|------------------------------------------------------------------------------|-------------|-------------------|
| <i>ballet, modern, or jazz, general, rehearsal or class</i>                  | 5           | dancing           |
| <i>ballet, modern, or jazz, performance, vigorous effort</i>                 | 6.8         | dancing           |
| <b>Skating*</b>                                                              | <b>8</b>    |                   |
| <i>skating, ice, 9 mph or less</i>                                           | 5.5         | winter activities |
| <i>skating, ice, general (Taylor Code 360)</i>                               | 7           | winter activities |
| <i>skating, ice, rapidly, more than 9 mph, not competitive</i>               | 9           | winter activities |
| <i>skating, speed, competitive</i>                                           | 13.3        | winter activities |
| <b>Swimming Laps*</b>                                                        | <b>7.8</b>  |                   |
| <i>swimming laps, freestyle, fast, vigorous effort</i>                       | 9.8         | water activities  |
| <i>swimming laps, freestyle, front crawl, slow, light or moderate effort</i> | 5.8         | water activities  |
| <b>Swimming*</b>                                                             | <b>8</b>    |                   |
| <i>swimming laps, freestyle, fast, vigorous effort</i>                       | 9.8         | water activities  |
| <i>swimming laps, freestyle, front crawl, slow, light or moderate effort</i> | 5.8         | water activities  |
| <i>swimming, backstroke, general, training or competition</i>                | 9.5         | water activities  |
| <i>swimming, backstroke, recreational</i>                                    | 4.8         | water activities  |
| <i>swimming, breaststroke, general, training or competition</i>              | 10.3        | water activities  |
| <i>swimming, breaststroke, recreational</i>                                  | 5.3         | water activities  |
| <i>swimming, butterfly, general</i>                                          | 13.8        | water activities  |
| <i>swimming, crawl, fast speed, ~75 yards/minute, vigorous effort</i>        | 10          | water activities  |
| <i>swimming, crawl, medium speed, ~50 yards/minute, vigorous effort</i>      | 8.3         | water activities  |
| <i>swimming, lake, ocean, river (Taylor Codes 280, 295)</i>                  | 6           | water activities  |
| <i>swimming, leisurely, not lap swimming, general</i>                        | 6           | water activities  |
| <i>swimming, sidestroke, general</i>                                         | 7           | water activities  |
| <i>swimming, synchronized</i>                                                | 8           | water activities  |
| <i>swimming, treading water, fast, vigorous effort</i>                       | 9.8         | water activities  |
| <i>swimming, treading water, moderate effort, general</i>                    | 3.5         | water activities  |
| <b>Basketball Pickups*</b>                                                   | <b>6.25</b> |                   |
| <i>basketball, non-game, general (Taylor Code 480)</i>                       | 6           | sports            |
| <i>basketball, general</i>                                                   | 6.5         | sports            |
| <i>basketball, shooting baskets</i>                                          | 4.5         | sports            |
| <i>basketball, drills, practice</i>                                          | 9.3         | sports            |

\*Mets score was calculated as the median of exercise subtypes (italic font)

**Supplemental Table 4:** Gas chromatography-mass spectrometry information of fatty acid methyl esters determined in the study.

| Fatty acid methyl ester        | Corresponding fatty acid (IUPAC name)                         | Retention time (minutes) | Quantifier ion (m/z) | Qualifier ion (m/z) | PubChem ID                                                                                                          |
|--------------------------------|---------------------------------------------------------------|--------------------------|----------------------|---------------------|---------------------------------------------------------------------------------------------------------------------|
| Methyl miristate               | tetradecanoic acid                                            | 6.9                      | 74.0                 | 87.0                | <a href="https://pubchem.ncbi.nlm.nih.gov/compound/31284">https://pubchem.ncbi.nlm.nih.gov/compound/31284</a>       |
| Methyl palmitate               | hexadecanoic acid                                             | 8.0                      | 74.0                 | 87.0                | <a href="https://pubchem.ncbi.nlm.nih.gov/compound/8181">https://pubchem.ncbi.nlm.nih.gov/compound/8181</a>         |
| Methyl palmitoleate            | (Z)-hexadec-9-enoic acid                                      | 8.2                      | 55.0                 | 74.0                | <a href="https://pubchem.ncbi.nlm.nih.gov/compound/643801">https://pubchem.ncbi.nlm.nih.gov/compound/643801</a>     |
| Methyl stearate                | octadecanoic acid                                             | 9.3                      | 74.0                 | 87.0                | <a href="https://pubchem.ncbi.nlm.nih.gov/compound/8201">https://pubchem.ncbi.nlm.nih.gov/compound/8201</a>         |
| Methyl elaidate                | (E)-octadec-9-enoic acid                                      | 9.4                      | 55.0                 | 74.0                | <a href="https://pubchem.ncbi.nlm.nih.gov/compound/5280590">https://pubchem.ncbi.nlm.nih.gov/compound/5280590</a>   |
| Methyl oleate                  | (Z)-octadec-9-enoic acid                                      | 9.5                      | 55.0                 | 74.0                | <a href="https://pubchem.ncbi.nlm.nih.gov/compound/5364509">https://pubchem.ncbi.nlm.nih.gov/compound/5364509</a>   |
| Methyl linoleate               | (9Z,12Z)-octadeca-9,12-dienoic acid                           | 9.9                      | 81.0                 | 67.0                | <a href="https://pubchem.ncbi.nlm.nih.gov/compound/5284421">https://pubchem.ncbi.nlm.nih.gov/compound/5284421</a>   |
| Methyl linolenate              | (9Z,12Z,15Z)-octadeca-9,12,15-trienoic acid                   | 10.4                     | 79.0                 | 81.0                | <a href="https://pubchem.ncbi.nlm.nih.gov/compound/5319706">https://pubchem.ncbi.nlm.nih.gov/compound/5319706</a>   |
| Methyl arachidate              | icosanoic acid                                                | 10.9                     | 74.0                 | 87.0                | <a href="https://pubchem.ncbi.nlm.nih.gov/compound/14259">https://pubchem.ncbi.nlm.nih.gov/compound/14259</a>       |
| Methyl eicosenoate             | icos-9-enoic acid                                             | 11.1                     | 55.0                 | 74.0                |                                                                                                                     |
| Methyl eicosadienoate          | (5Z,14Z)-icosa-8,11-dienoic acid                              | 11.6                     | 81.0                 | 67.0                | <a href="https://pubchem.ncbi.nlm.nih.gov/compound/5365566">https://pubchem.ncbi.nlm.nih.gov/compound/5365566</a>   |
| Methyl dihomo-gamma-linolenate | (8Z,11Z,14Z)-icosa-8,11,14-trienoic acid                      | 12.0                     | 79.0                 | 81.0                | <a href="https://pubchem.ncbi.nlm.nih.gov/compound/5363092">https://pubchem.ncbi.nlm.nih.gov/compound/5363092</a>   |
| Methyl arachidonate            | (5Z,8Z,11Z,14Z)-icosa-5,8,11,14-tetraenoic acid               | 12.2                     | 79.0                 | 91.0                | <a href="https://pubchem.ncbi.nlm.nih.gov/compound/6421258">https://pubchem.ncbi.nlm.nih.gov/compound/6421258</a>   |
| Methyl behenate                | docosanoic acid                                               | 12.7                     | 74.0                 | 87.0                | <a href="https://pubchem.ncbi.nlm.nih.gov/compound/13584">https://pubchem.ncbi.nlm.nih.gov/compound/13584</a>       |
| Methyl eicosapentaenoate       | (5Z,8Z,11Z,14Z,17Z)-icosa-5,8,11,14,17-pentaenoic acid        | 12.8                     | 79.0                 | 91.0                | <a href="https://pubchem.ncbi.nlm.nih.gov/compound/13829678">https://pubchem.ncbi.nlm.nih.gov/compound/13829678</a> |
| Methyl lignocerate             | Tetracosanoic acid                                            | 14.7                     | 74.0                 | 87.0                | <a href="https://pubchem.ncbi.nlm.nih.gov/compound/75546">https://pubchem.ncbi.nlm.nih.gov/compound/75546</a>       |
| Methyl docosahexaenoate        | (4Z,7Z,10Z,13Z,16Z,19Z)-docosa-4,7,10,13,16,19-hexaenoic acid | 15.1                     | 79.0                 | 91.0                | <a href="https://pubchem.ncbi.nlm.nih.gov/compound/6421262">https://pubchem.ncbi.nlm.nih.gov/compound/6421262</a>   |

## References

1. Chan, J.L., Heist, K., DePaoli, A.M., Veldhuis, J.D. & Mantzoros, C.S. The role of falling leptin levels in the neuroendocrine and metabolic adaptation to short-term starvation in healthy men. *J Clin Invest* **111**, 1409-1421 (2003).
2. Chan, J.L., *et al.* Differential regulation of metabolic, neuroendocrine, and immune function by leptin in humans. *Proc Natl Acad Sci U S A* **103**, 8481-8486 (2006).
3. Chan, J.L., *et al.* Leptin does not mediate short-term fasting-induced changes in growth hormone pulsatility but increases IGF-I in leptin deficiency states. *J Clin Endocrinol Metab* **93**, 2819-2827 (2008).
4. Pilitsi, E., Peradze, N., Perakakis, N. & Mantzoros, C.S. Circulating levels of the components of the GH/IGF-1/IGFBPs axis total and intact IGF-binding proteins (IGFBP) 3 and IGFBP 4 and total IGFBP 5, as well as PAPP A, PAPP A2 and Stanniocalcin-2 levels are not altered in response to energy deprivation and/or metreleptin administration in humans. *Metabolism* **97**, 32-39 (2019).
5. Kang, E.S., Magkos, F., Sienkiewicz, E. & Mantzoros, C.S. Circulating vaspin and visfatin are not affected by acute or chronic energy deficiency or leptin administration in humans. *Eur J Endocrinol* **164**, 911-917 (2011).
6. Chan, J.L., Wong, S.L. & Mantzoros, C.S. Pharmacokinetics of subcutaneous recombinant methionyl human leptin administration in healthy subjects in the fed and fasting states: regulation by gender and adiposity. *Clin Pharmacokinet* **47**, 753-764 (2008).
7. Chou, S.H., *et al.* Leptin is an effective treatment for hypothalamic amenorrhea. *Proc Natl Acad Sci U S A* **108**, 6585-6590 (2011).
8. Welt, C.K., *et al.* Recombinant human leptin in women with hypothalamic amenorrhea. *N Engl J Med* **351**, 987-997 (2004).
9. Chan, J.L., Mietus, J.E., Raciti, P.M., Goldberger, A.L. & Mantzoros, C.S. Short-term fasting-induced autonomic activation and changes in catecholamine levels are not mediated by changes in leptin levels in healthy humans. *Clin Endocrinol (Oxf)* **66**, 49-57 (2007).
10. Brinkoetter, M., Magkos, F., Vamvini, M. & Mantzoros, C.S. Leptin treatment reduces body fat but does not affect lean body mass or the myostatin-follistatin-activin axis in lean hypoleptinemic women. *Am J Physiol Endocrinol Metab* **301**, E99-E104 (2011).

**a. Correlation of % weight changes with leptin levels before treatment initiation adjusted for leptin dose in study 2 (72h-fasting treated with escalating leptin doses)**

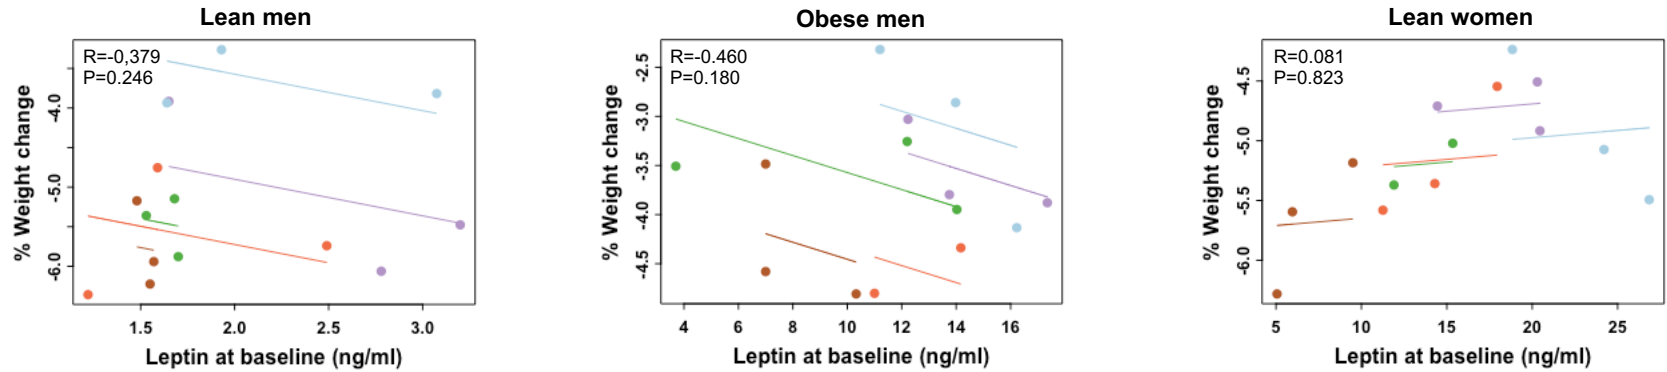

**b. % Weight change in each group treated with different doses of leptin in study 2 (72h-fasting treated with escalating leptin doses)**

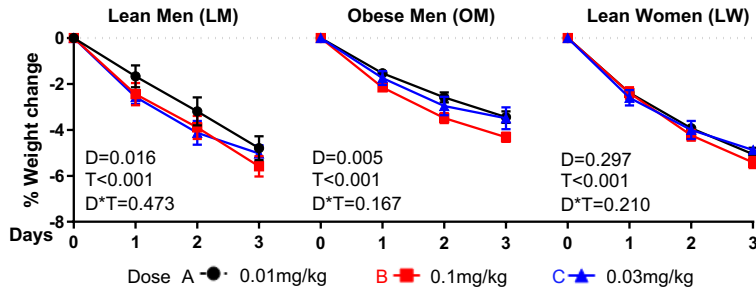

**c. % Change in lean mass in study 3 (open-label long-term leptin treatment)**

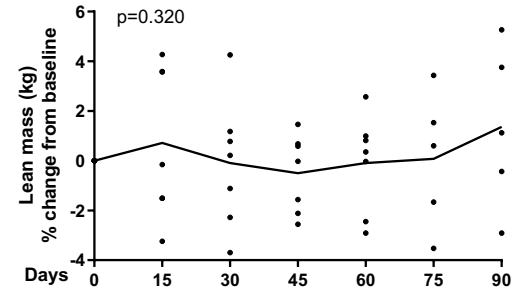

**d. % Change in lean mass in study 4 (placebo-controlled long-term leptin treatment)**

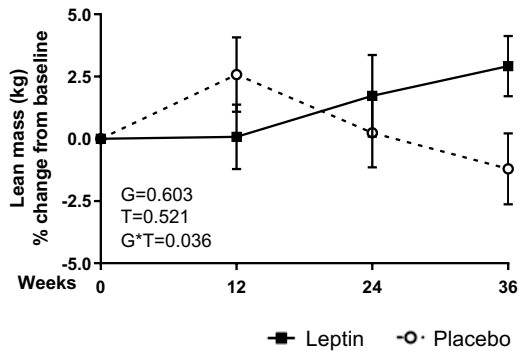

**e. Correlation of energy intake with leptin levels prior to meal adjusted for treatment in study 1 (72h-fasting treated with leptin or placebo)**

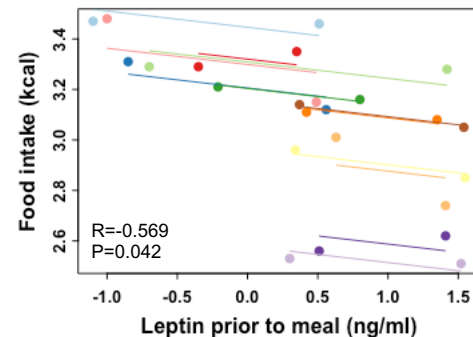

## Supplementary Figure 1

- a. Correlation of baseline leptin levels with % weight changes after 72-hour fasting treated with escalating leptin doses (Study 2). Three dots of the same color correspond to the three correlation points one subject contributes to the graph, i.e. one dot for each of the doses. The line refers to the correlation curve that derives from the same colored dots. The reported R is the total, calculated from the individual line curves of each subject and is thus adjusted for the fact that each subject contributed three points (for each leptin dose) in the correlation.
- b. Comparison of % weight change between the three leptin doses (Study 2). P-values of D (Dose, i.e. 0.01, 0.1, 0.3 mg/kg/day), T (Time) and D\*T interaction of mixed models adjusted for baseline are reported.
- c. % changes in lean mass during open-label long-term leptin treatment (Study 3). P-value of time effect of mixed models adjusted for baseline is reported.
- d. % changes in lean mass during a placebo-controlled long-term leptin treatment (study 4). Two sided p-values of G (Group, i.e. placebo or leptin), T (Time) and G\*T interaction of mixed models are reported. Post-hoc t-tests for the different timepoints by G\*T<0.001 were performed but were not significant.
- e. Correlation of leptin levels before an ad-libitum meal with energy intake at the meal after 72-hour fasting treated with leptin or placebo (Study 1). Two dots of the same color correspond to the two correlation points that one subject contributes to the graph, i.e. one for placebo and one for leptin treatment. The line refers to the correlation curve that derives from the two same-colored dots. The reported R is the total, calculated from the individual line curves of each subject and is thus adjusted for the fact that each subject contributed two points (placebo and leptin) in the correlation. Energy intake and leptin values were logarithmically transformed to improve linearity for performing the repeated measures analysis. In a and e R and p-value were calculated with rmcrr package in R studio. In b and d data are presented as Means  $\pm$  SEMs.

### Exact p-values

**Sup. Figure 1b:** Lean Men T=0.005 $\times$ 10<sup>-21</sup>; Obese Men T=0.001 $\times$ 10<sup>-15</sup>; Lean Women T=0.008 $\times$ 10<sup>-18</sup>



### Dose A: Leptin 0.01mg/kg

Lean Men

Obese Men

Lean Women

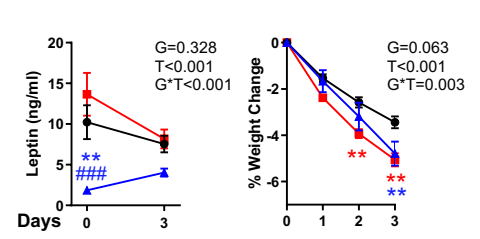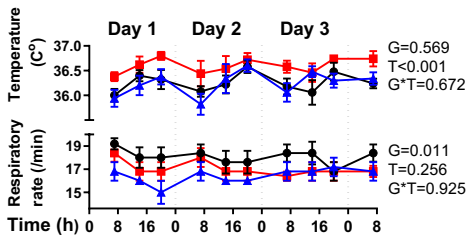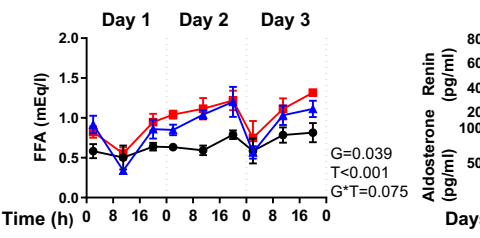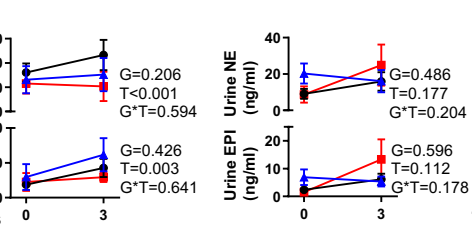

### Dose B: Leptin 0.1mg/kg

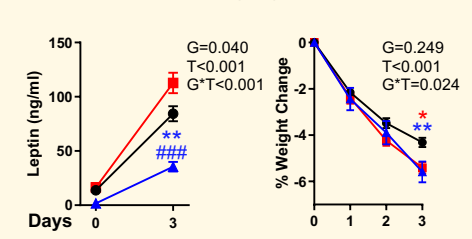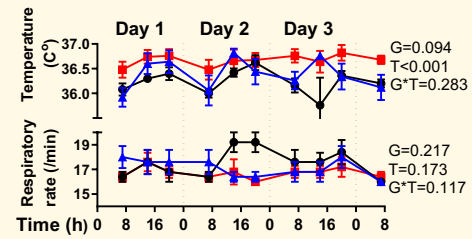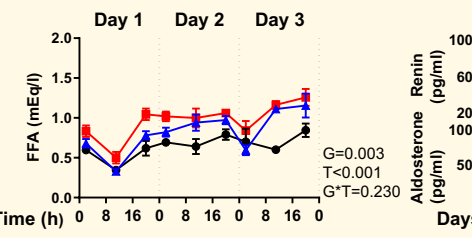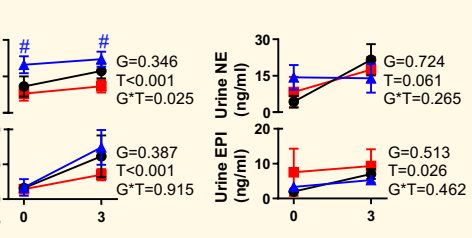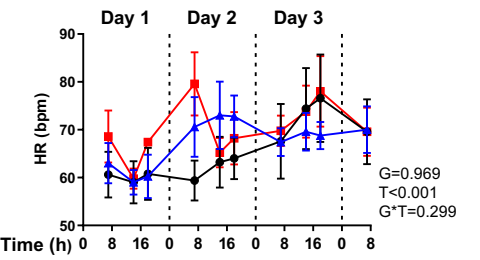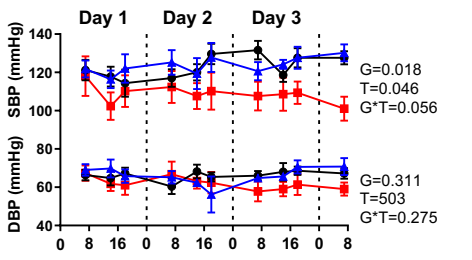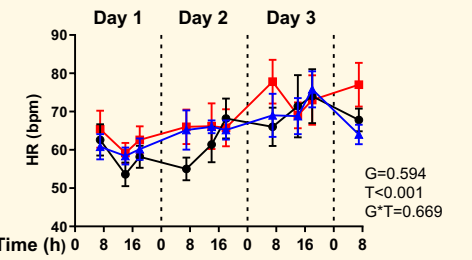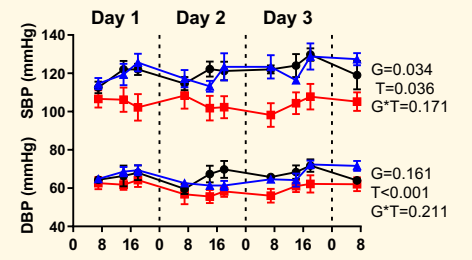

### Dose C: Leptin 0.3mg/kg

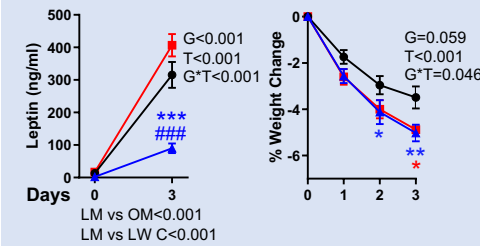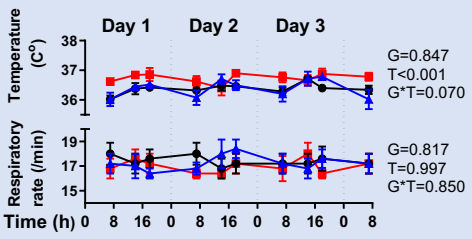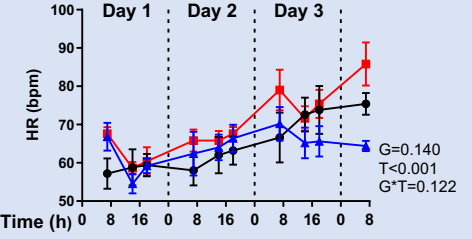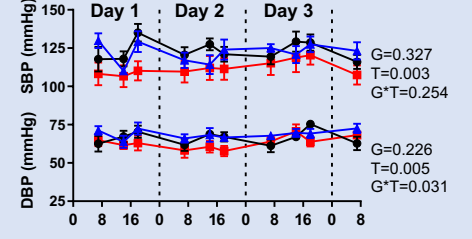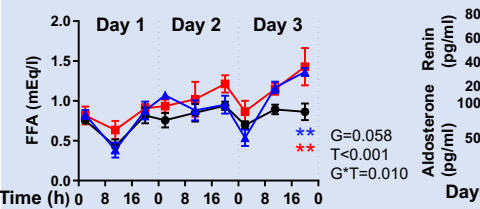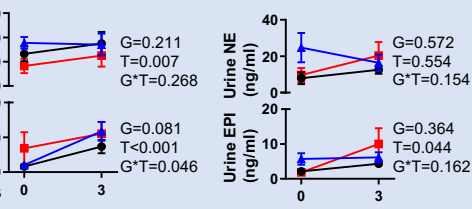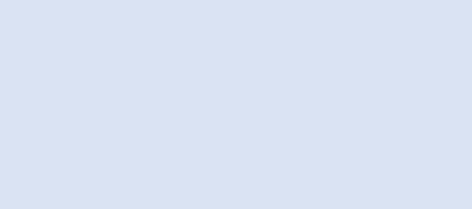

## Supplementary Figure 2: Comparison of the effects of escalating doses of leptin during 72-hour fasting between lean men, obese men and lean women (Study 2; n=15 [5 lean men, 5 obese men and 5 lean women]).

White panel corresponds to physiologic dose A, beige panel to supraphysiologic dose B and blue panel to pharmacologic dose C. Leptin levels, % weight change, respiratory rate, body temperature, free fatty acids (FFA), aldosterone, renin, urine epinephrine (EPI), urine norepinephrine (NE), heart rate (HR), systolic (SBP), and diastolic (DBP) blood pressure, are demonstrated in each panel. Means  $\pm$  SEMs are demonstrated. Two-sides p-values of G (Group, i.e. lean men vs obese men vs lean women), T (Time, i.e. days/hours of fasting) and G\*T (Group with Time interaction) of mixed model analysis adjusted for baseline are reported. By p of G or G\*T<0.05, post-hoc Bonferroni test was performed both between the estimated means of the three groups and between the three groups at each timepoint. One, two or three asterisks correspond to p<0.05, <0.01 or <0.001, respectively. Asterisks are blue for lean men vs obese men and red for lean women vs obese men; Three blue hash signs correspond to p<0.001 for lean men vs lean women. LM: Lean Men; OM: Obese Men; LW: Lean Women.

### Exact p-values

**Dose A : Leptin** T=0.001 $\times$ 10<sup>-8</sup>; G\*T=0.007 $\times$ 10<sup>-2</sup>; Baseline LMvsOM=0.006 & LMvsLW=0.001 $\times$ 10<sup>-1</sup>. **Weight Change%** T=0.001 $\times$ 10<sup>-21</sup>; Day 2 LWvsOM=0.009; Day 3 LMvsOM=0.009; Day 3 LWvsOM=0.002. **Temperature** T=0.003 $\times$ 10<sup>-2</sup>. **FFA** T=0.005 $\times$ 10<sup>-10</sup>. **Renin** T=0.004 $\times$ 10<sup>-3</sup>. **HR** T=0.002 $\times$ 10<sup>-1</sup>

**Dose B: Leptin** T=0.004 $\times$ 10<sup>-13</sup>; G\*T=0.002 $\times$ 10<sup>-2</sup>; Day 3 LMvsOM=0.005; Day 3 LMvsLW=0.001 $\times$ 10<sup>-1</sup>. **Weight Change%** T=0.006 $\times$ 10<sup>-25</sup>; Day 3 LWvsOM=0.026; Day 3 LMvsOM=0.001. **Temperature** T=0.003 $\times$ 10<sup>-2</sup>. **FFA** T=0.002 $\times$ 10<sup>-11</sup>. **Aldosterone** T=0.002 $\times$ 10<sup>-3</sup>. **Renin** T=0.001 $\times$ 10<sup>-9</sup>; Baseline LMvsLW=0.015; Day 3 LMvsLW=0.025. **HR** T=0.004 $\times$ 10<sup>-4</sup>. **DBP** T=0.003 $\times$ 10<sup>-1</sup>

**Dose C: Leptin** G=0.001 $\times$ 10<sup>-1</sup>; T=0.002 $\times$ 10<sup>-16</sup>; G\*T=0.001 $\times$ 10<sup>-5</sup>; LMvsOM=0.001 $\times$ 10<sup>-1</sup>; LMvsLW=0.001 $\times$ 10<sup>-1</sup>; Day 3 LMvsOM=0.005 $\times$ 10<sup>-1</sup>; Day 3 LMvsLW=0.001 $\times$ 10<sup>-1</sup>. **Weight Change%** T=0.009 $\times$ 10<sup>-10</sup>; Day 2 LMvsOM=0.037; Day 3 LMvsOM=0.009; Day 3 LWvsOM=0.018. **Temperature** T=0.002 $\times$ 10<sup>-1</sup>. **FFA** T=0.001 $\times$ 10<sup>-10</sup>; Day 3 (16hrs) LMvsOM=0.002 & LWvsOM=0.002. **Aldosterone** T=0.003 $\times$ 10<sup>-7</sup>. **HR** T=0.007 $\times$ 10<sup>-6</sup>

### Dose A: Leptin 0.01mg/kg

Lean Men (blue triangles), Obese Men (black circles), Lean Women (red squares), Obese Women (black squares)

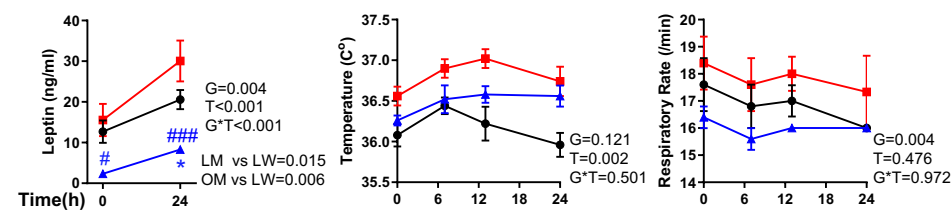

### Dose B: Leptin 0.1mg/kg

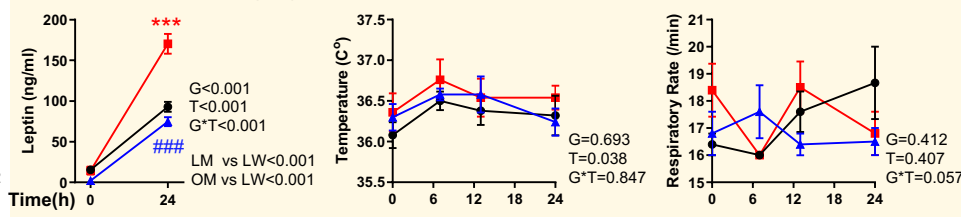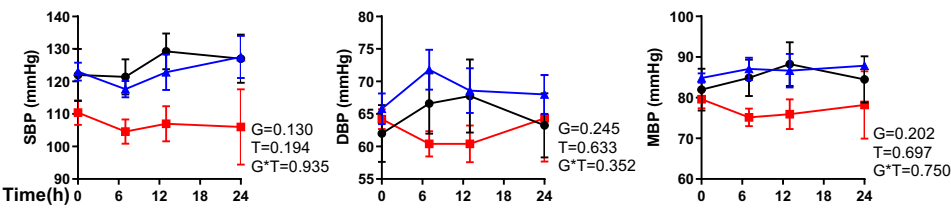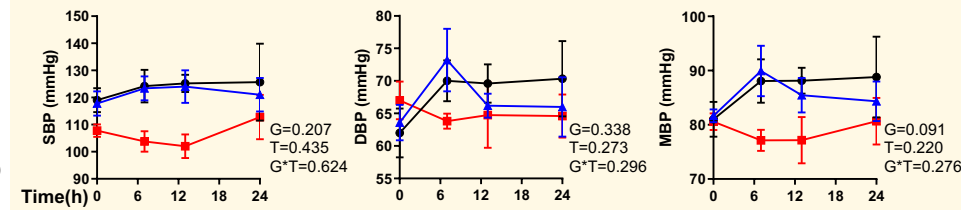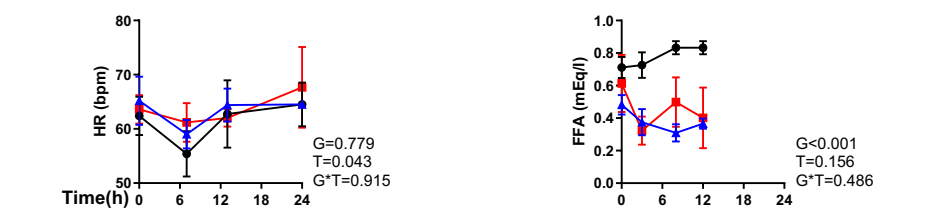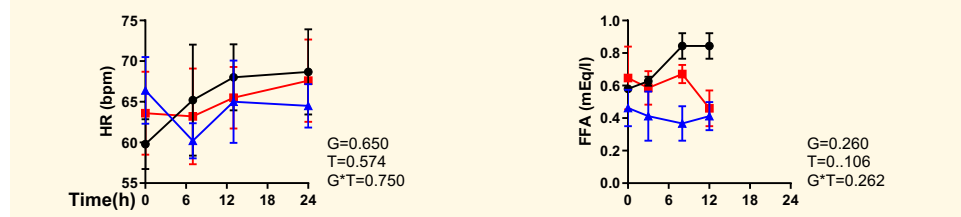

### Dose C: Leptin 0.3mg/kg

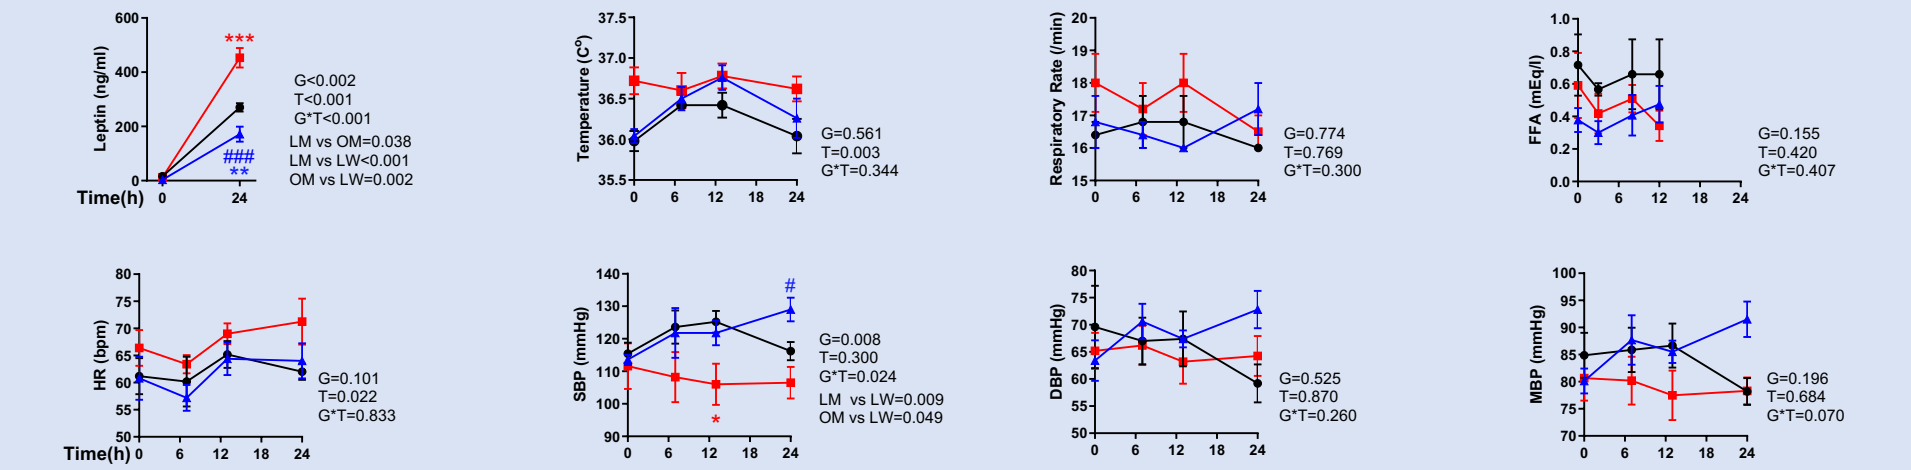

### Supplementary Figure 3: Comparison of the effects of a single administration of escalating doses of leptin in the 24-hour fed state between lean men, obese men and lean women (Study 2; n=15 [5 lean men, 5 obese men and 5 lean women]).

White panel corresponds to physiologic dose A, beige panel to supraphysiologic dose B and blue panel to pharmacologic dose C. Leptin levels, body temperature, respiratory rate, systolic (SBP), diastolic (DBP), mean (MBP) blood pressure, heart rate (HR), and free fatty acids (FFA) are demonstrated in each panel. Means  $\pm$  SEMs are demonstrated. Mixed model analysis was performed adjusted for baseline. Two-sided p-values of G (Group, i.e. lean men vs obese men vs lean women), T (Time, i.e. hours from leptin administration) and G\*T (Group with Time interaction) of mixed model analysis adjusted for baseline are reported. By p of G or G\*T<0.05, post-hoc Bonferroni test was performed both between the estimated means of the three groups and between the three groups at each timepoint. One, two or three asterisks correspond to p<0.05, <0.01 or <0.001, respectively. Asterisks are blue for lean men vs obese men and red for lean women vs obese men; One or three blue hash signs correspond to p<0.05 or <0.001, respectively for lean men vs lean women. LM: Lean Men; OM: Obese Men; LW: Lean Women.

#### Exact p-values

**Dose A: Leptin** T=0.003 $\times 10^{-6}$ ; G\*T=0.003 $\times 10^{-1}$ ; Baseline LMvsLW=0.015; Day1 (24hrs) LMvsOM=0.025 & LMvsLW=0.001 $\times 10^{-1}$ . **FFA** G=0.004 $\times 10^{-30}$

**Dose B: Leptin** G=0.003 $\times 10^{-2}$ ; T=0.008 $\times 10^{-8}$ ; G\*T=0.002 $\times 10^{-2}$ ; LMvsLW=0.001 $\times 10^{-1}$ ; LWvsOM=0.001 $\times 10^{-1}$ ; Day 1 (24hrs) LMvsLW=0.001 $\times 10^{-1}$  & LWvsOM=0.001 $\times 10^{-1}$

**Dose C: Leptin** G=0.002 $\times 10^{-2}$ ; T=0.001 $\times 10^{-6}$ ; G\*T=0.007 $\times 10^{-2}$ ; LMvsLW=0.001 $\times 10^{-1}$ ; Day 1 (24hrs) LMvsOM=0.005 & LWvsOM=0.001 $\times 10^{-1}$  & LMvsLW=0.001 $\times 10^{-1}$

**a. Macronutrient utilization in study 1 (72h-fed untreated or fasting treated with leptin or placebo)**

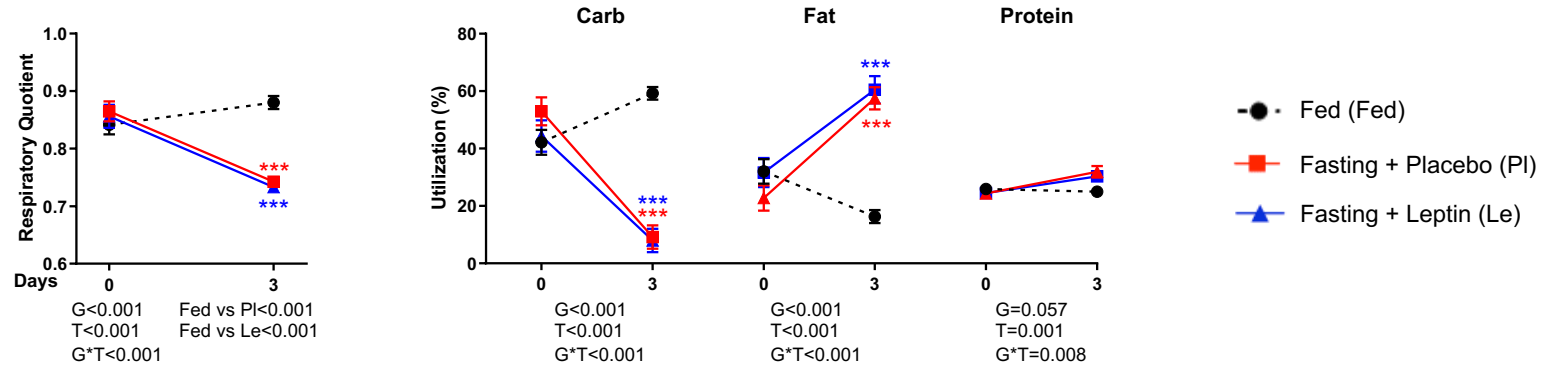

**b. Macronutrient utilization in study 3 (open-label long-term leptin treatment)**

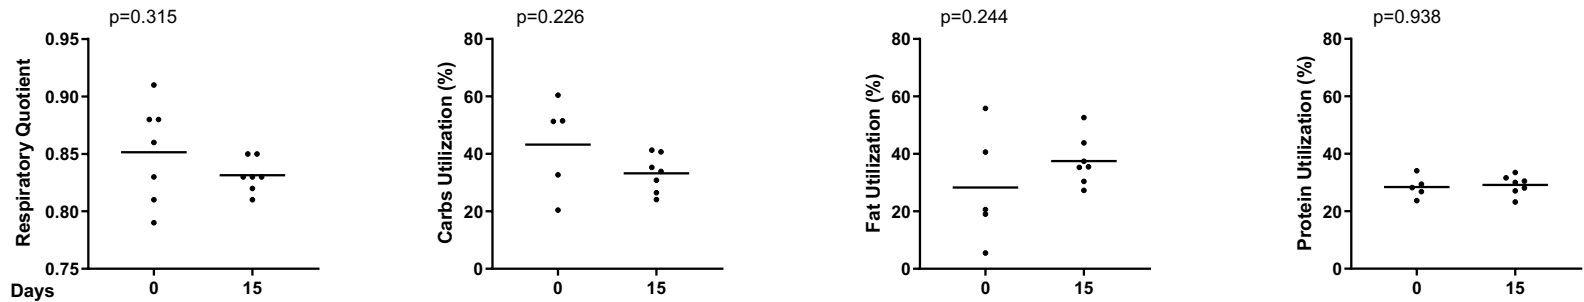

**c. Macronutrient utilization in study 4 (placebo-controlled long-term leptin treatment)**

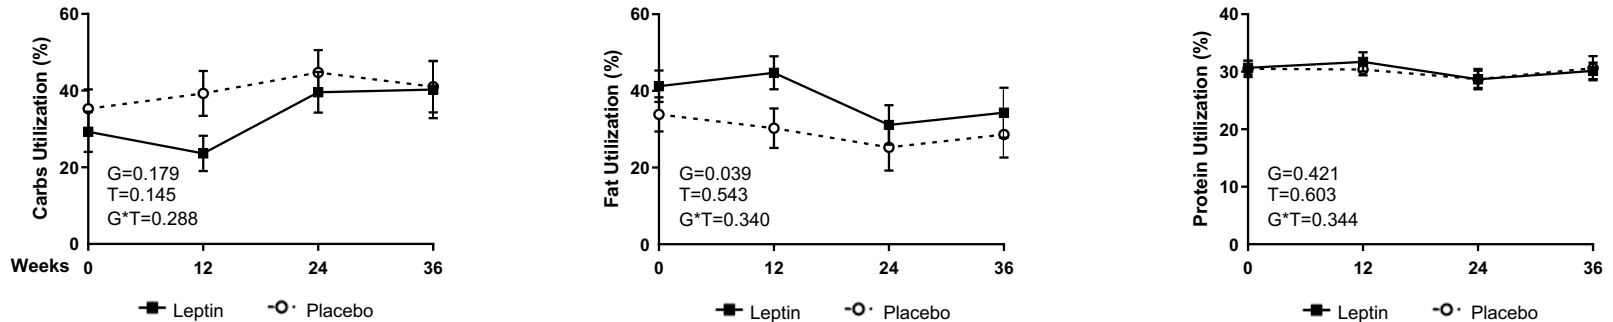

#### **Supplementary Figure 4: Short and long-term leptin effects on respiratory quotient and macronutrient utilization.**

a. 72-hour isocaloric fed state (untreated) or fasting treated with leptin or placebo (Study 1, n=13). *Left:* Respiratory quotient and *Right:* macronutrient utilization based on respiratory quotient at start and treatment completion. Means  $\pm$  SEMs are demonstrated. Mixed model was performed adjusted for baseline. Two-sided p-values of G (Group, i.e. fed untreated or fasting treated with placebo or leptin), T (Time, i.e. days of study) and G\*T (interaction of Group with Time) of mixed models are reported. By p of G\*T<0.05, post-hoc Bonferroni test was performed between the estimated means of the three groups (only significant results are demonstrated) and between the three groups at each timepoint. Three asterisks indicate p<0.001 in the Bonferroni post-hoc test. Asterisks are red for fed vs fasting+placebo and blue for fed vs fasting+leptin.

b. Open-label long-term leptin treatment in mildly hypoleptinemic women (Study 3, n=7). Respiratory quotient and calculation of utilization of carbohydrates, fats and proteins based on respiratory quotient (from left to right). Two-sided p-value of paired t-test is reported for respiratory quotient and macronutrient utilization.

c. Placebo-controlled long-term leptin treatment in mildly hypoleptinemic women (Study 4, n=19 [leptin group=10; placebo group=9]). Calculation of utilization of carbohydrates, fats and proteins (from left to right) based on respiratory quotient (previously published in <sup>30</sup>). P-values of G (Group, i.e. placebo or leptin), T (Time, i.e. weeks of study) and G\*T (interaction of Group with Time) of mixed models are reported.

#### **Exact p-values**

**RQ** G=0.001 $\times$ 10<sup>-3</sup>; T=0.003 $\times$ 10<sup>-9</sup>; G\*T=0.007 $\times$ 10<sup>-10</sup>; Fed vs Pl=0.002 $\times$ 10<sup>-2</sup>; Fed vs Le=0.003 $\times$ 10<sup>-7</sup>; Day 3 Fed vs Pl=0.001 $\times$ 10<sup>-12</sup> & Fed vs Le=0.003 $\times$ 10<sup>-13</sup>. **Carb Utilization (%)** G=0.004 $\times$ 10<sup>-11</sup>; T=0.004 $\times$ 10<sup>-9</sup>; G\*T=0.003 $\times$ 10<sup>-12</sup>; Fed vs Pl=0.007 $\times$ 10<sup>-10</sup>; Fed vs Le=0.001 $\times$ 10<sup>-8</sup>; Day 3 Fed vs Pl=0.004 $\times$ 10<sup>-12</sup> & Fed vs Le=0.003 $\times$ 10<sup>-13</sup>. **Fat Utilization (%)** G=0.003 $\times$ 10<sup>-7</sup>; T=0.001 $\times$ 10<sup>-4</sup>; G\*T=0.002 $\times$ 10<sup>-8</sup>; Fed vs Pl=0.004 $\times$ 10<sup>-6</sup>; Fed vs Le=0.002 $\times$ 10<sup>-5</sup>; Day 3 Fed vs Pl=0.002 $\times$ 10<sup>-11</sup> & Fed vs Le=0.005 $\times$ 10<sup>-9</sup>.

● Fed (Fed)    ■ Fasting + Placebo (PI)    ▲ Fasting + Leptin (Le)

### a. Ketone bodies

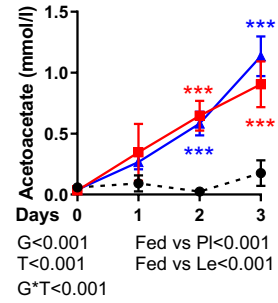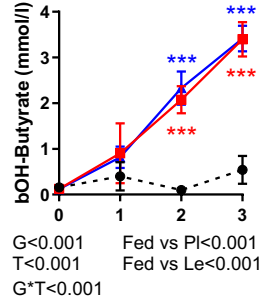

### b. Amino acids

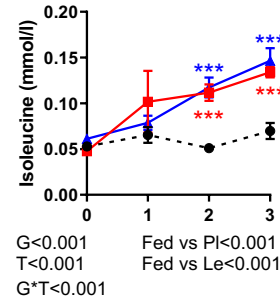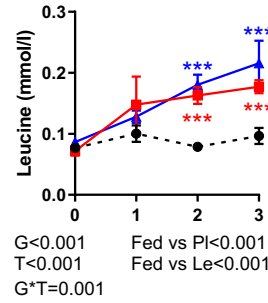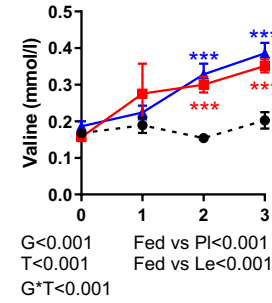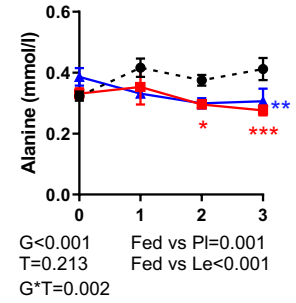

### c. Lipoproteins

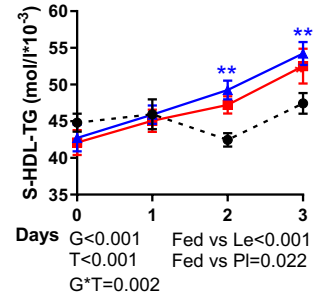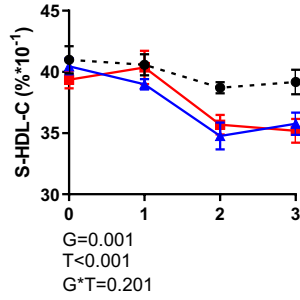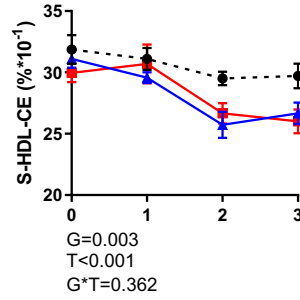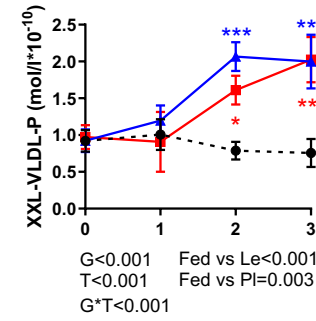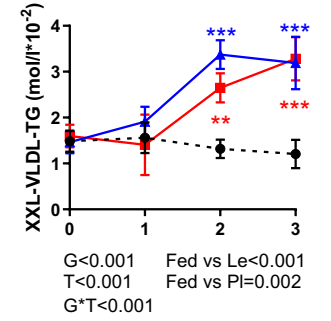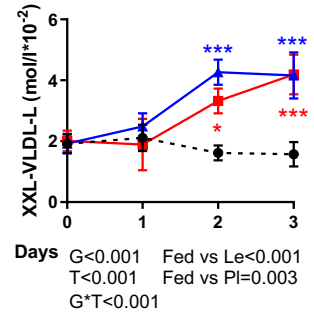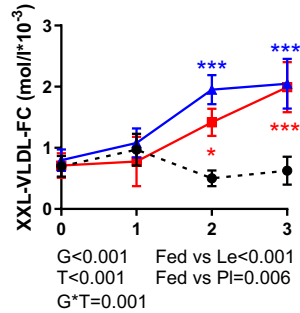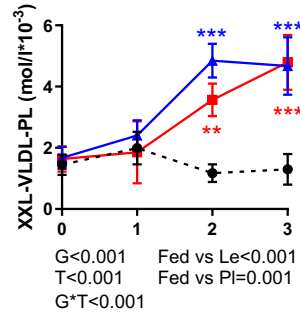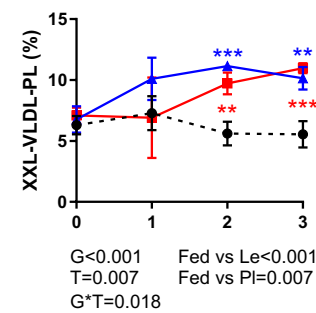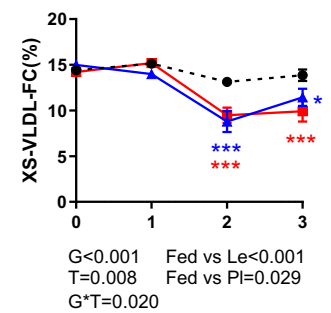

## Supplementary Figure 5: Effects on ketone bodies, amino acids and lipoprotein profile of 72-hour isocaloric fed state (untreated) or fasting treated with leptin or placebo (Study 1, n=13).

Blood concentrations of a. ketone bodies, b. amino acids and c. circulating profile of the ten most important lipoproteins according to sPLS-DA and one-way ANOVA; Means  $\pm$  SEMs are demonstrated. NMR - based metabolomics were used for quantification in serum samples. Mixed model was performed adjusted for baseline. P-values of G (Group, i.e. fed untreated or fasting treated with placebo or leptin), T (Time, i.e. days of study) and G\*T (interaction of Group with Time) of mixed models are reported. By p of G\*T<0.05, post-hoc Bonferroni test was performed between the estimated means of the three groups (only significant results are demonstrated) and between the three groups at each timepoint. One, two or three asterisks indicate p<0.05, <0.01 or <0.001, respectively in the Bonferroni post-hoc t-test. Asterisks are red for fed vs fasting+placebo and blue for fed vs fasting+leptin. VLDL, very low density lipoprotein; LDL, low density lipoprotein; IDL, intermediate density lipoprotein; HDL, high density lipoprotein; XS, S, M, L, XL, XXL indicates consecutive size of lipoprotein particles, i.e. very small, small, medium, large, very large, or very very large; P, Concentration of Particles; C, cholesterol; CE, cholesterol esters; FC, free cholesterol; PL, phospholipids; TG, triglycerides; (%) indicates % of the parameter in relation to total lipids.

### Exact p-values

**Acetoacetate** G=0.006 $\times$ 10<sup>-6</sup>; T=0.004 $\times$ 10<sup>-11</sup>; G\*T=0.001 $\times$ 10<sup>-2</sup>; Fed vs PI= 0.006 $\times$ 10<sup>-3</sup>; Fed vs Le=0.003 $\times$ 10<sup>-5</sup>; Day 2 Fed vs PI=0.001 $\times$ 10<sup>-1</sup> & Fed vs Le=0.001 $\times$ 10<sup>-1</sup>; Day 3 Fed vs PI=0.001 $\times$ 10<sup>-1</sup> & Fed vs Le=0.001 $\times$ 10<sup>-1</sup>

**bOH-Butyrate** G=0.003 $\times$ 10<sup>-12</sup>; T=0.002 $\times$ 10<sup>-20</sup>; G\*T=0.004 $\times$ 10<sup>-8</sup>; Fed vs PI= 0.003 $\times$ 10<sup>-11</sup>; Fed vs Le=0.008 $\times$ 10<sup>-8</sup>; Day 2 Fed vs PI=0.001 $\times$ 10<sup>-1</sup> & Fed vs Le=0.001 $\times$ 10<sup>-1</sup>; Day 3 Fed vs PI=0.001 $\times$ 10<sup>-1</sup> & Fed vs Le=0.001 $\times$ 10<sup>-1</sup>

**Isoleucine** G=0.001 $\times$ 10<sup>-10</sup>; T=0.005 $\times$ 10<sup>-12</sup>; G\*T=0.002 $\times$ 10<sup>-4</sup>; Fed vs PI= 0.003 $\times$ 10<sup>-4</sup>; Fed vs Le=0.003 $\times$ 10<sup>-5</sup>; Day 2 Fed vs PI=0.001 $\times$ 10<sup>-1</sup> & Fed vs Le=0.001 $\times$ 10<sup>-1</sup>; Day 3 Fed vs PI=0.001 $\times$ 10<sup>-1</sup> & Fed vs Le=0.001 $\times$ 10<sup>-1</sup>

**Leucine** G=0.005 $\times$ 10<sup>-7</sup>; T=0.001 $\times$ 10<sup>-6</sup>; G\*T=0.007 $\times$ 10<sup>-2</sup>; Fed vs PI= 0.001 $\times$ 10<sup>-1</sup>; Fed vs Le=0.005 $\times$ 10<sup>-5</sup>; Day 2 Fed vs PI=0.002 $\times$ 10<sup>-1</sup> & Fed vs Le=0.001 $\times$ 10<sup>-1</sup>; Day 3 Fed vs PI=0.004 $\times$ 10<sup>-1</sup> & Fed vs Le=0.001 $\times$ 10<sup>-1</sup>

**Valine** G=0.002 $\times$ 10<sup>-10</sup>; T=0.008 $\times$ 10<sup>-10</sup>; G\*T=0.006 $\times$ 10<sup>-5</sup>; Fed vs PI= 0.002 $\times$ 10<sup>-4</sup>; Fed vs Le=0.007 $\times$ 10<sup>-8</sup>; Day 2 Fed vs PI=0.001 $\times$ 10<sup>-1</sup> & Fed vs Le=0.001 $\times$ 10<sup>-1</sup>; Day 3 Fed vs PI=0.001 $\times$ 10<sup>-1</sup> & Fed vs Le=0.001 $\times$ 10<sup>-1</sup>

**Alanine** G=0.001 $\times$ 10<sup>-2</sup>; Fed vs Le=0.009 $\times$ 10<sup>-2</sup>; Day 2 Fed vs PI=0.046 $\times$ 10<sup>-1</sup>; Day 3 Fed vs PI=0.002 $\times$ 10<sup>-1</sup> & Fed vs Le=0.006

**S-HDL-TG** G=0.005 $\times$ 10<sup>-1</sup>; T=0.005 $\times$ 10<sup>-8</sup>; Fed vs PI= 0.022; Fed vs Le=0.005 $\times$ 10<sup>-1</sup>; Day 2 Fed vs Le=0.004; Day 3 Fed vs Le=0.005

**S-HDL-C(%)** T=0.006 $\times$ 10<sup>-7</sup>

**S-HDL-CE(%)** T=0.007 $\times$ 10<sup>-6</sup>

**XXL-VLDL-P** G=0.003 $\times$ 10<sup>-4</sup>; T=0.001 $\times$ 10<sup>-2</sup>; G\*T=0.001 $\times$ 10<sup>-1</sup>; Fed vs PI= 0.003; Fed vs Le=0.003 $\times$ 10<sup>-4</sup>; Day 2 Fed vs PI=0.017 & Fed vs Le=0.001 $\times$ 10<sup>-1</sup>; Day 3 Fed vs PI=0.001 $\times$ 10<sup>-1</sup> & Fed vs Le=0.001 $\times$ 10<sup>-1</sup>

**XXL-VLDL-TG** G=0.002 $\times$ 10<sup>-4</sup>; T=0.005 $\times$ 10<sup>-3</sup>; G\*T=0.001 $\times$ 10<sup>-1</sup>; ; Fed vs PI= 0.002; Fed vs Le=0.002 $\times$ 10<sup>-4</sup>; Day 2 Fed vs PI=0.005 & Fed vs Le=0.001 $\times$ 10<sup>-1</sup>; Day 3 Fed vs PI=0.001 $\times$ 10<sup>-1</sup> & Fed vs Le=0.001 $\times$ 10<sup>-1</sup>

**XXL-VLDL-L** G=0.005 $\times$ 10<sup>-4</sup>; T=0.002 $\times$ 10<sup>-2</sup>; G\*T=0.002 $\times$ 10<sup>-1</sup>; Fed vs Le=0.004 $\times$ 10<sup>-4</sup>; Day 2 Fed vs PI=0.019 & Fed vs Le=0.001 $\times$ 10<sup>-1</sup>; Day 3 Fed vs PI=0.002 $\times$ 10<sup>-1</sup> & Fed vs Le=0.001 $\times$ 10<sup>-1</sup>

**XXL-VLDL-FC** G=0.006 $\times$ 10<sup>-3</sup>; T=0.003 $\times$ 10<sup>-2</sup>; Fed vs Le=0.005 $\times$ 10<sup>-3</sup>; Day 2 Fed vs PI=0.029 & Fed vs Le=0.001 $\times$ 10<sup>-1</sup>; Day 3 Fed vs PI=0.002 $\times$ 10<sup>-1</sup> & Fed vs Le=0.006 $\times$ 10<sup>-1</sup>

**XXL-VLDL-PL** G=0.005 $\times$ 10<sup>-4</sup>; T=0.002 $\times$ 10<sup>-3</sup>; G\*T=0.002 $\times$ 10<sup>-1</sup>; Fed vs Le=0.005 $\times$ 10<sup>-3</sup>; Day 2 Fed vs PI=0.007 & Fed vs Le=0.001 $\times$ 10<sup>-1</sup>; Day 3 Fed vs PI=0.001 $\times$ 10<sup>-1</sup> & Fed vs Le=0.001 $\times$ 10<sup>-1</sup>

**XXL-VLDL-PL(%)** G=0.003 $\times$ 10<sup>-3</sup>; Fed vs Le=0.002 $\times$ 10<sup>-3</sup>; Day 2 Fed vs PI=0.001 & Fed vs Le=0.002 $\times$ 10<sup>-1</sup>; Day 3 Fed vs PI=0.005 $\times$ 10<sup>-1</sup> & Fed vs Le=0.003

**XXL-VLDL-FC(%)** G=0.003 $\times$ 10<sup>-1</sup>; Fed vs Le=0.003 $\times$ 10<sup>-1</sup>; Day 2 Fed vs PI=0.008 $\times$ 10<sup>-1</sup> & Fed vs Le=0.001 $\times$ 10<sup>-1</sup>; Day 3 Fed vs PI=0.004 $\times$ 10<sup>-1</sup> & Fed vs Le=0.041



**a. Metabolome**

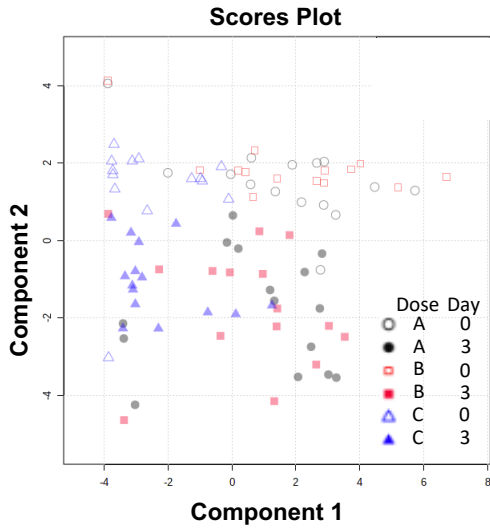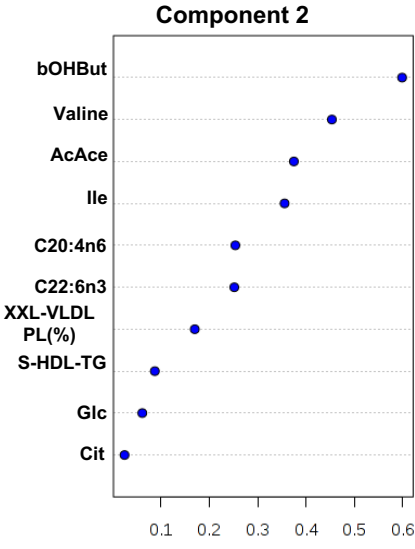

**b. Lipoproteins**

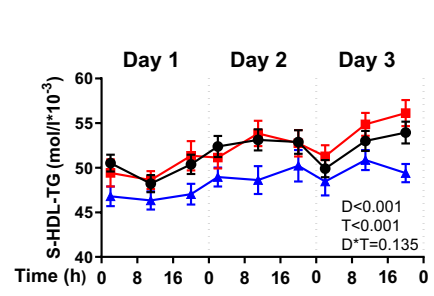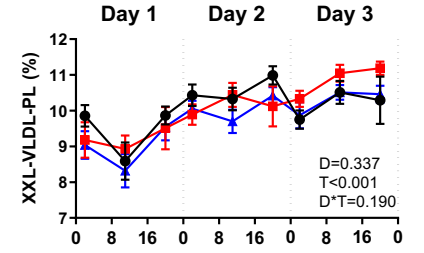

**c. Ketone bodies and amino acids**

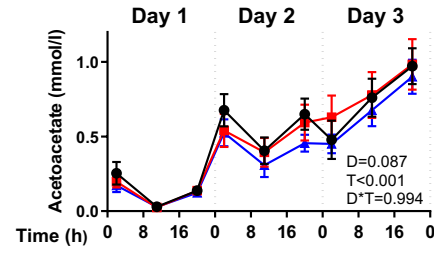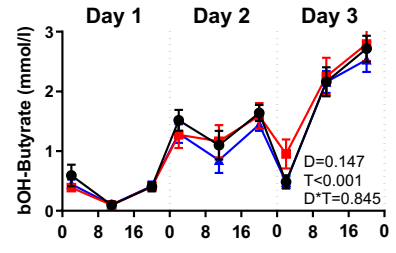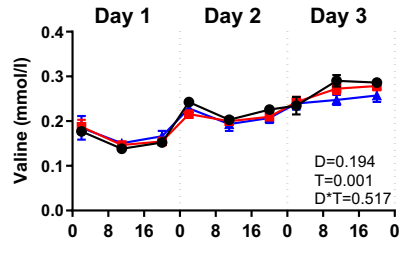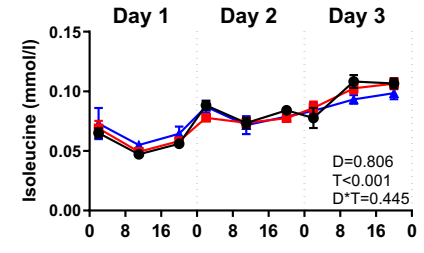

**d. Fatty acids**

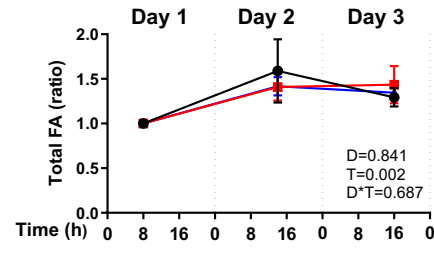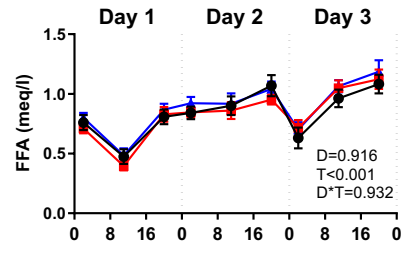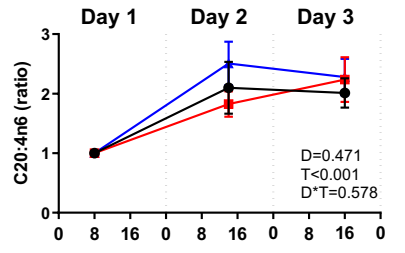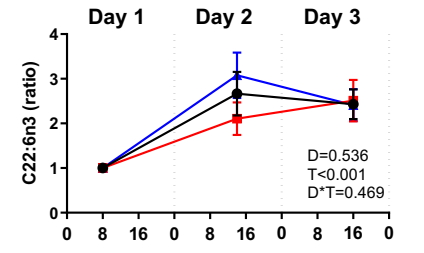

## Supplementary figure 6: Effects on metabolite and lipid metabolism of escalating leptin doses during 72-hour fasting (Study 2, n=15).

a. sPLS-DA analysis. Left: Score plot of component 1 and component 2. Symbols indicate the measurement of component 1 in relation to the measurement of component 2 for one subject/on one leptin dose/on one day: Black circles correspond to dose A, red squares to dose B and blue triangles to dose C. Unfilled symbols start of treatment (Day 0) and filled symbols end of treatment (Day 3). Unfilled symbols (start of the treatment) are gathered at the upper half of the plot and filled symbols (end of the treatment) are gathered at the lower half of the plot, showing that component 2 is able to differentiate start from end of treatment (independent of dose) Right: Parameters that compose component 2 and their level of contribution (loading) in the component.

Circulating profile of the ten most important parameters according to sPLS-DA and one-way ANOVA belonging to following categories b. lipoproteins, c. ketone bodies and aminoacids, d. fatty acids. Data are presented as Means  $\pm$  SEMs.

NMR - based metabolomics were used to quantify amino acids, metabolites, and lipids bound to lipoproteins in serum samples. GC/MS-EI was used to quantify fatty acid methyl esters in whole plasma. P-values of D (Dose, i.e. 0.01, 0.1, 0.3 mg/kg/day), T (Time, i.e. hours of study) and D\*T (interaction of Dose with Time) of mixed models adjusted for baseline (except for fatty acids expressed as ratios of baseline) are reported. For sPLS-DA, baseline was considered the earliest available measurements at Day 1 (i.e. 2:00 for lipoproteins and FFA and 8:00 for fatty acids) and as day 3 measurement the 12:00 for lipoproteins and FFA and the 14:00 for fatty acids.

### Exact p-values

**Sup. Figure 5b: S-HDL-TG** D=0.009 $\times$ 10<sup>-7</sup> & T=0.002 $\times$ 10<sup>-19</sup>; **XXL-VLDL-PL (%)** T=0.003 $\times$ 10<sup>-20</sup>

**Sup. Figure 5c: Acetoacetate** T= 0.002 $\times$ 10<sup>-49</sup>; **bOH-Butyrate** T=0.006 $\times$ 10<sup>-80</sup>; **Valine** T=0.005 $\times$ 10<sup>-51</sup>; **Isoleucine** T= 0.005 $\times$ 10<sup>-41</sup>

**Sup. Figure 5d: FFA** T=0.001 $\times$ 10<sup>-6</sup>; **C20:4n6(ratio)** T= 0.002 $\times$ 10<sup>-6</sup>; **C22:6n3(ratio)** T=0.001 $\times$ 10<sup>-6</sup>

### Study 1

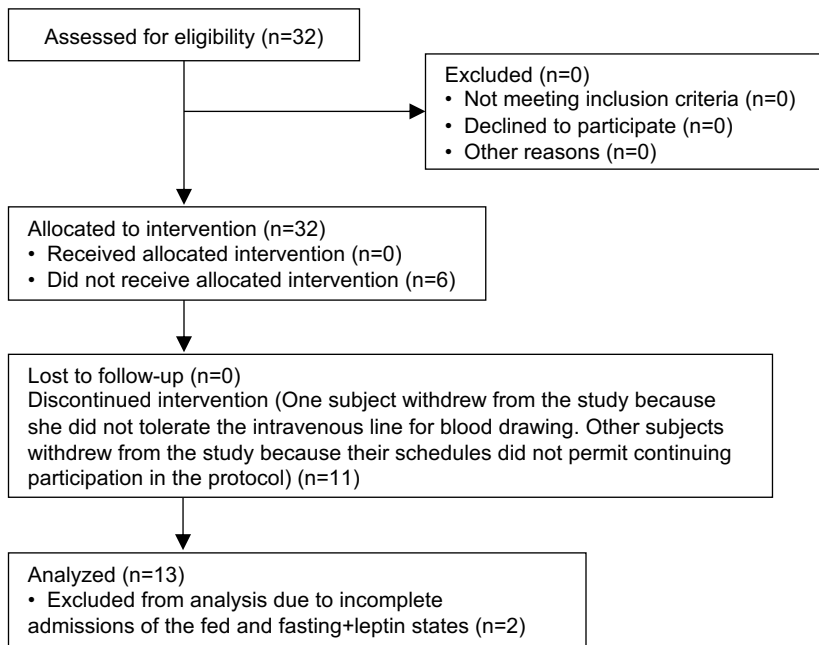

### Study 2

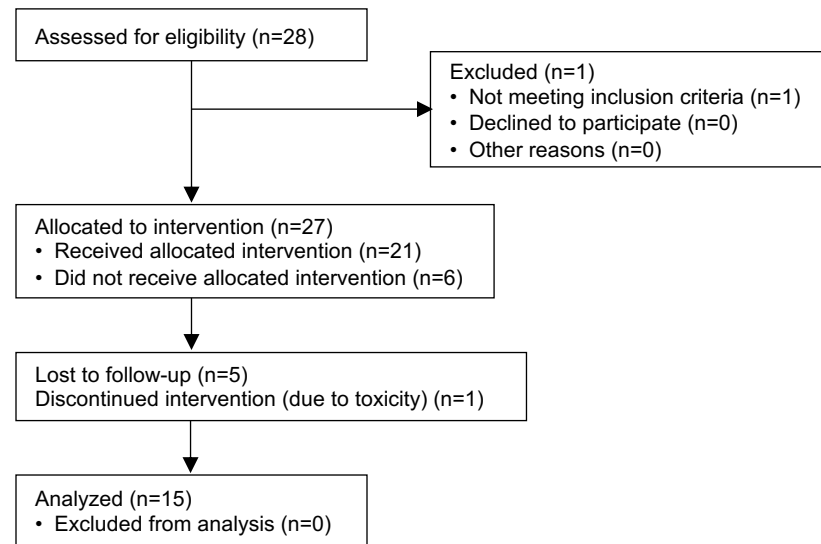

### Study 3

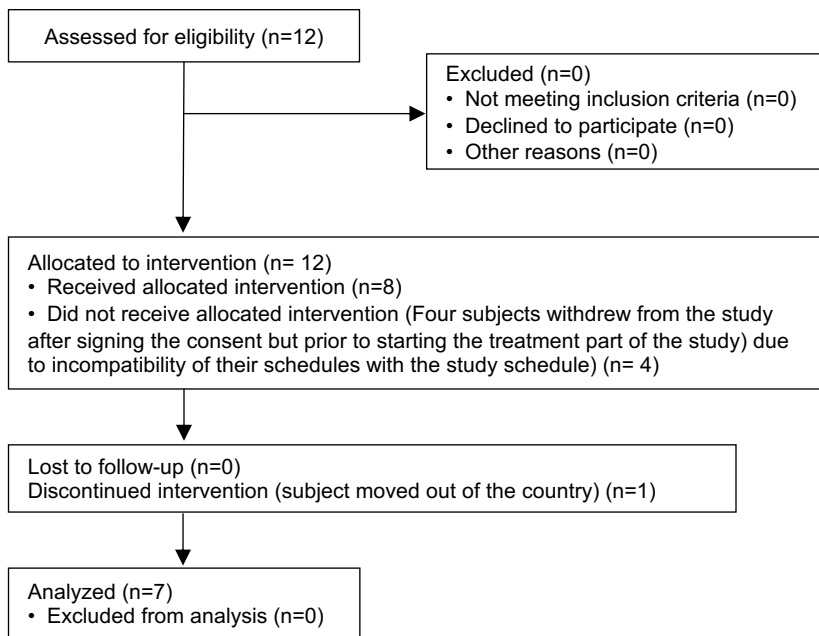

### Study 4

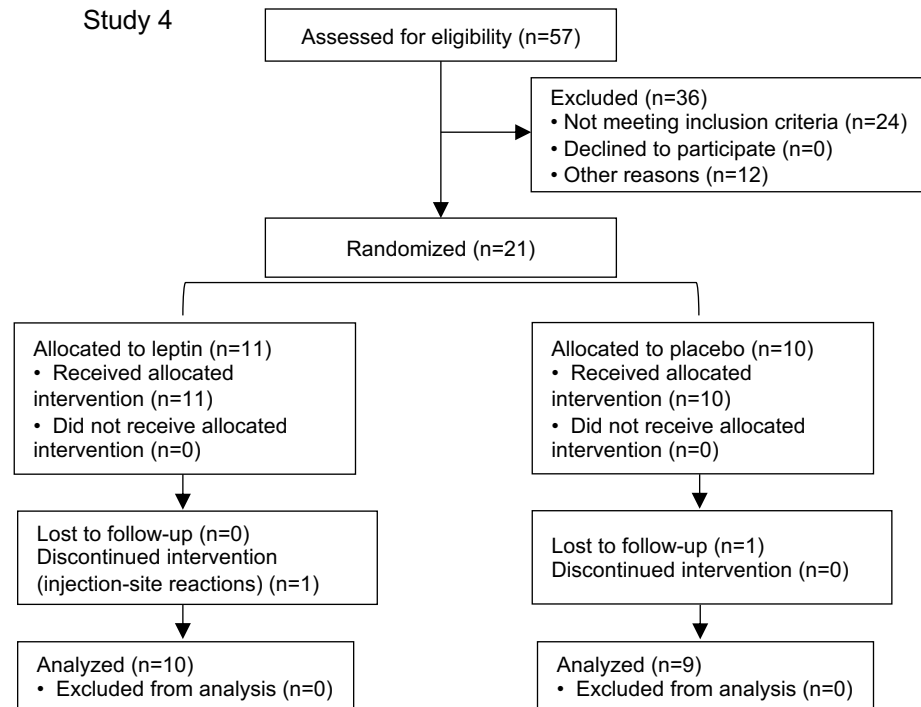

## Supplementary Figure 7: Flow-diagrams of the four clinical trials

## Supplementary Note: Consort Checklist

| Section/Topic                    | Item No | Checklist item                                                                                                                                                                              | Reported on page No |
|----------------------------------|---------|---------------------------------------------------------------------------------------------------------------------------------------------------------------------------------------------|---------------------|
| <b>Title and abstract</b>        |         |                                                                                                                                                                                             |                     |
|                                  | 1a      | Identification as a randomised trial in the title                                                                                                                                           | -                   |
|                                  | 1b      | Structured summary of trial design, methods, results, and conclusions (for specific guidance see CONSORT for abstracts)                                                                     | 2                   |
| <b>Introduction</b>              |         |                                                                                                                                                                                             |                     |
| Background and objectives        | 2a      | Scientific background and explanation of rationale                                                                                                                                          | 3-4                 |
|                                  | 2b      | Specific objectives or hypotheses                                                                                                                                                           | 3-4                 |
| <b>Methods</b>                   |         |                                                                                                                                                                                             |                     |
| Trial design                     | 3a      | Description of trial design (such as parallel, factorial) including allocation ratio                                                                                                        | 17-21               |
|                                  | 3b      | Important changes to methods after trial commencement (such as eligibility criteria), with reasons                                                                                          | -                   |
| Participants                     | 4a      | Eligibility criteria for participants                                                                                                                                                       | 17-21               |
|                                  | 4b      | Settings and locations where the data were collected                                                                                                                                        | 17-21               |
| Interventions                    | 5       | The interventions for each group with sufficient details to allow replication, including how and when they were actually administered                                                       | 17-21               |
| Outcomes                         | 6a      | Completely defined pre-specified primary and secondary outcome measures, including how and when they were assessed                                                                          | 17-21               |
|                                  | 6b      | Any changes to trial outcomes after the trial commenced, with reasons                                                                                                                       | -                   |
| Sample size                      | 7a      | How sample size was determined                                                                                                                                                              | -                   |
|                                  | 7b      | When applicable, explanation of any interim analyses and stopping guidelines                                                                                                                | -                   |
| Randomisation:                   |         |                                                                                                                                                                                             |                     |
| Sequence generation              | 8a      | Method used to generate the random allocation sequence                                                                                                                                      | -                   |
|                                  | 8b      | Type of randomisation; details of any restriction (such as blocking and block size)                                                                                                         | -                   |
| Allocation concealment mechanism | 9       | Mechanism used to implement the random allocation sequence (such as sequentially numbered containers), describing any steps taken to conceal the sequence until interventions were assigned | -                   |
| Implementation                   | 10      | Who generated the random allocation sequence, who enrolled participants, and who assigned participants to interventions                                                                     | -                   |
| Blinding                         | 11a     | If done, who was blinded after assignment to interventions (for example, participants, care providers, those assessing outcomes) and how                                                    | -                   |
|                                  | 11b     | If relevant, description of the similarity of interventions                                                                                                                                 | -                   |
| Statistical methods              | 12a     | Statistical methods used to compare groups for primary and secondary outcomes                                                                                                               | 25-28               |
|                                  | 12b     | Methods for additional analyses, such as subgroup analyses and adjusted analyses                                                                                                            | 25-28               |

|                                                      |     |                                                                                                                                                   |                       |
|------------------------------------------------------|-----|---------------------------------------------------------------------------------------------------------------------------------------------------|-----------------------|
| <b>Results</b>                                       |     |                                                                                                                                                   |                       |
| Participant flow (a diagram is strongly recommended) | 13a | For each group, the numbers of participants who were randomly assigned, received intended treatment, and were analysed for the primary outcome    | Sup. Figure 7         |
|                                                      | 13b | For each group, losses and exclusions after randomisation, together with reasons                                                                  | 17-21 & Sup. Figure 7 |
| Recruitment                                          | 14a | Dates defining the periods of recruitment and follow-up                                                                                           | -                     |
|                                                      | 14b | Why the trial ended or was stopped                                                                                                                | -                     |
| Baseline data                                        | 15  | A table showing baseline demographic and clinical characteristics for each group                                                                  | -                     |
| Numbers analysed                                     | 16  | For each group, number of participants (denominator) included in each analysis and whether the analysis was by original assigned groups           | 17-21                 |
| Outcomes and estimation                              | 17a | For each primary and secondary outcome, results for each group, and the estimated effect size and its precision (such as 95% confidence interval) | -                     |
|                                                      | 17b | For binary outcomes, presentation of both absolute and relative effect sizes is recommended                                                       | -                     |
| Ancillary analyses                                   | 18  | Results of any other analyses performed, including subgroup analyses and adjusted analyses, distinguishing pre-specified from exploratory         | 4-12                  |
| Harms                                                | 19  | All important harms or unintended effects in each group (for specific guidance see CONSORT for harms)                                             | -                     |
| <b>Discussion</b>                                    |     |                                                                                                                                                   |                       |
| Limitations                                          | 20  | Trial limitations, addressing sources of potential bias, imprecision, and, if relevant, multiplicity of analyses                                  | 16                    |
| Generalisability                                     | 21  | Generalisability (external validity, applicability) of the trial findings                                                                         | 15-16                 |
| Interpretation                                       | 22  | Interpretation consistent with results, balancing benefits and harms, and considering other relevant evidence                                     | 12-15                 |
| <b>Other information</b>                             |     |                                                                                                                                                   |                       |
| Registration                                         | 23  | Registration number and name of trial registry                                                                                                    | 18, 19, 21            |
| Protocol                                             | 24  | Where the full trial protocol can be accessed, if available                                                                                       | -                     |
| Funding                                              | 25  | Sources of funding and other support (such as supply of drugs), role of funders                                                                   | 33                    |
