# Supplementary material for: Leptin alters energy intake and fat mass but not energy expenditure in lean subjects
Source: PubMed Central journal article supplement (PMC7553922; doi:10.1038/s41467-020-18885-9), 2020-10-13
Supplement: 41467_2020_18885_MOESM2_ESM.pdf [file 41467_2020_18885_MOESM2_ESM.pdf]

Editorial Note: This manuscript has been previously reviewed at another journal that is not operating a transparent peer review scheme. This document only contains reviewer comments and rebuttal letters for versions considered at *Nature Communications*.

Reviewers' Comments:

Reviewer #3:

Remarks to the Author:

Reviewer critiques have been adequately addressed.
